# Supplementary material
Source: PubMed Central journal article supplement (PMC2919852)
Supplement: NIHMS208953-supplement-2.pdf [file NIHMS208953-supplement-2.pdf]

## SUPPLEMENTARY DISCUSSION

### The value of purifying VLPs for viral metagenomic projects

When each of the 32 fecal VLP-associated viromes, sequenced to an average depth of  $7.8 \pm 2.9$  Mb (per sample) was used to query the 12 microbiomes sampled to an average depth of  $92.2 \pm 17.5$  Mb, we noted that  $55.8 \pm 32.4$  % (mean  $\pm$  SD) of viral sequences generated from the VLP preps from a given human host were detectable in that individual's sequenced fecal microbiome. When a deeply sampled VLP-virome (70.16 Mb) was used to query 0.91 Gb of pyrosequencer reads from the corresponding deeply sequenced fecal microbiome<sup>15</sup>, the percentage of VLP-derived sequences found in the fecal community DNA sample was 76.14% (**Fig. S15**). Using the same BLAST E-value threshold cutoff, we performed a reciprocal analysis, asking what percentage of the total sequences present in each of the microbiome datasets matched to sequences present in VLP datasets generated from fecal samples collected from that human host. The results disclosed that viral reads represented  $3.5 \pm 2.2$ % (mean  $\pm$  SD) of total fecal community DNA sequences in the case of the 12 more shallowly sequenced microbiomes, and 2.5% in the case of the deeply sequenced microbiome and its corresponding deeply sequenced virome (**Fig. S15a**). These findings support a view that at the present time isolating VLPs is an efficient and direct way to characterize phage populations associated with a given (fecal) microbial community.

### CRISPRs

Clusters of Interspaced Short Palindromic Repeats (CRISPR) elements are stretches of DNA composed of short palindromic repeats (23-47bp) that flank short "spacers" composed of viral DNA; their presence in a bacterial genome represents a key component of host defense against bacteriophage attack<sup>1,2</sup>. We used CRISPR-Finder<sup>37</sup> to search sequenced human gut microbial genomes; CRISPR elements were detected in 48 of 74 human gut bacterial species queried and in a prominent human gut archaeon

(*Methanobrevibacter smithii*) (see **Table S9** for the list of genomes). We identified a total of 95 different direct repeats and 2,196 different spacers. These direct repeats were subsequently used to interrogate the fecal microbiome datasets to identify reads that contained at least two copies of the same direct repeat. The spacers interposed between these repeats were subsequently extracted, and together with the spacers from the 121 sequenced human gut microbial genomes used to search for sequences with high similarity in VLP viromes (defined by Cross\_match; maximum of 1 gap allowed and similarity over  $\geq 90\%$  of its length). This effort yielded 1,262 reads that were similar ( $\geq 90\%$  identity) to a spacer sequence. Sixteen of the 38 VLP viromes (including technical replicates of samples from members of families F1-4 and the deeply sequenced virome) had hits to spacers derived from fecal microbiomes. In the 12 sequenced fecal community microbiomes for which there were corresponding VLP preparations, the only hits to the viromes were spacers represented in another individual's microbiome (**Table S11**). In this analysis of fecal microbiome datasets from a single time point, and at this depth of shotgun sequencing of the microbiome, the absence of detectable viral sequences with significant similarity to bacterial spacers in a given individual's fecal microbiome suggests that viruses to which their bacterial communities were resistant are not represented in the corresponding VLP preparation. If temperate phage dominate in the fecal microbiome, we would not expect such resistance to appear at least as judged by the representation of CRISPR spacers in viromes and microbiomes. However, additional and deeper shotgun datasets of total fecal microbial community DNA need to be generated from samples collected at all time points surveyed for each individual in order to further assess whether resistance does or does not occur.

### **Eukaryotic viruses represented in VLP viromes**

Although 73% of the sequences in the NR\_Viral\_DB belong to eukaryotic viruses, none of the VLP samples yielded reads covering more than 50% of the genome

of any known eukaryotic virus (tblastx, e-value < 1e-3). Eukaryotic viruses with hits throughout more than 20% of their genomes included: (i) six non-human Herpesviridae with 22–49% genome coverage; (ii) one Maculavirus (Grapevine\_fleck\_virus; 39% coverage of its 7,564bp genome); (iii) one Aquareovirus (Aquareovirus\_A\_segment\_11; 26% coverage of this 783bp segment of its genome); (iv) one Parapoxivirus (Bovine\_papular\_stomatitis\_virus; 22% coverage of its 134,431bp genome); and (v) one human Rotavirus (Human\_rotavirus\_G3\_segment\_11; 21% coverage of this 1,043bp genome segment).

## Supplementary Figures and Legends

**Fig. S1. Percent of pyrosequencing reads generated from VLP preparations that map to the NR\_Viral\_DB.** Sample-by-sample distribution of the percentage of VLP-derived reads with hits (tblastx, e-value < 1e-3) to the NR\_Viral\_DB. See the legend to **Fig. 1** in the main text for an explanation of the nomenclature used to designate samples.

Reyes *et al.*, Supplementary Fig. 1

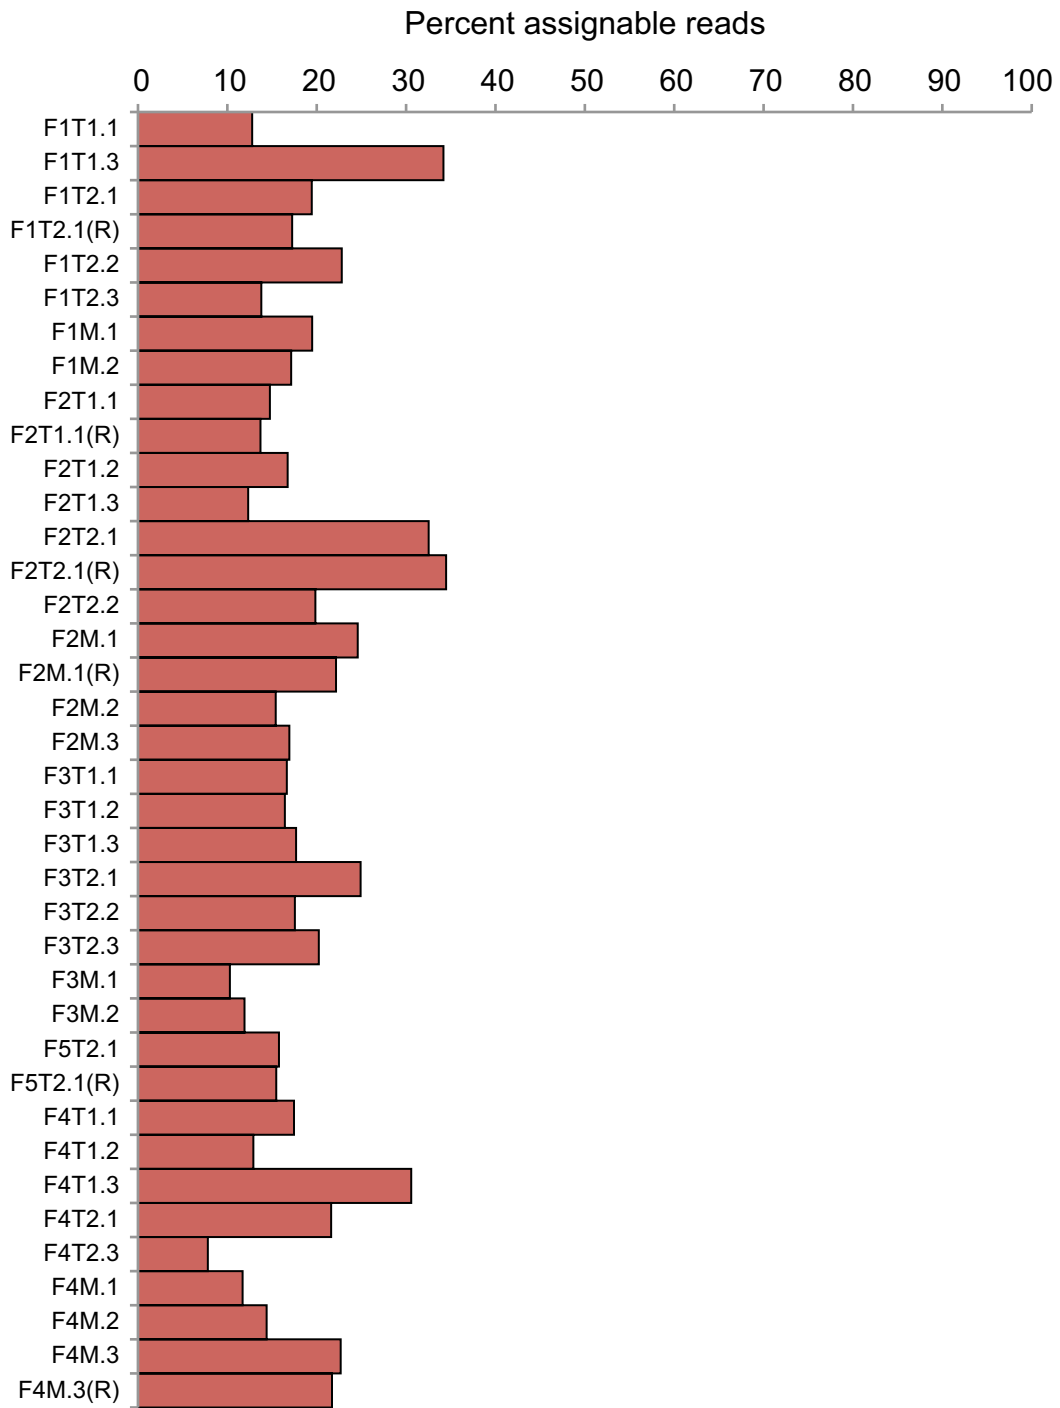

**Fig. S2. Correlating family-level bacteria taxa present in fecal samples with the known bacterial hosts of bacteriophage present in the NR\_Viral\_DB and their identified homologs in fecal VLP metagenomic datasets.** The Universal Bacterial 16S rRNA tree in Greengenes was downloaded ([http://greengenes.lbl.gov/Download/Taxonomic\\_Outlines/](http://greengenes.lbl.gov/Download/Taxonomic_Outlines/)), collapsed at a family level based on NCBI taxonomy, and branches colored according to their assigned phyla. The left panel corresponds to distribution and relative abundance (1.0 = most abundant) of the different samples according to 16S rRNA data. The middle panel shows the distribution and percent coverage of bacteriophage genomes from the NR\_Viral\_DB by VLP-derived reads; phage genomes are classified according to their host taxonomy. The right panel shows the distribution and relative abundance of the known bacterial hosts of phage present in the NR\_Viral\_DB. Columns are sorted by individual and time points of fecal sampling. Green arrows point to ssDNA phage from *Chlamydia* and *Bdellovibrio* known to be preferentially amplified by WGA methods<sup>17</sup>. For sample abbreviations see **Fig 1** in the main text.

Reyes *et al.*, Supplementary Fig. 2

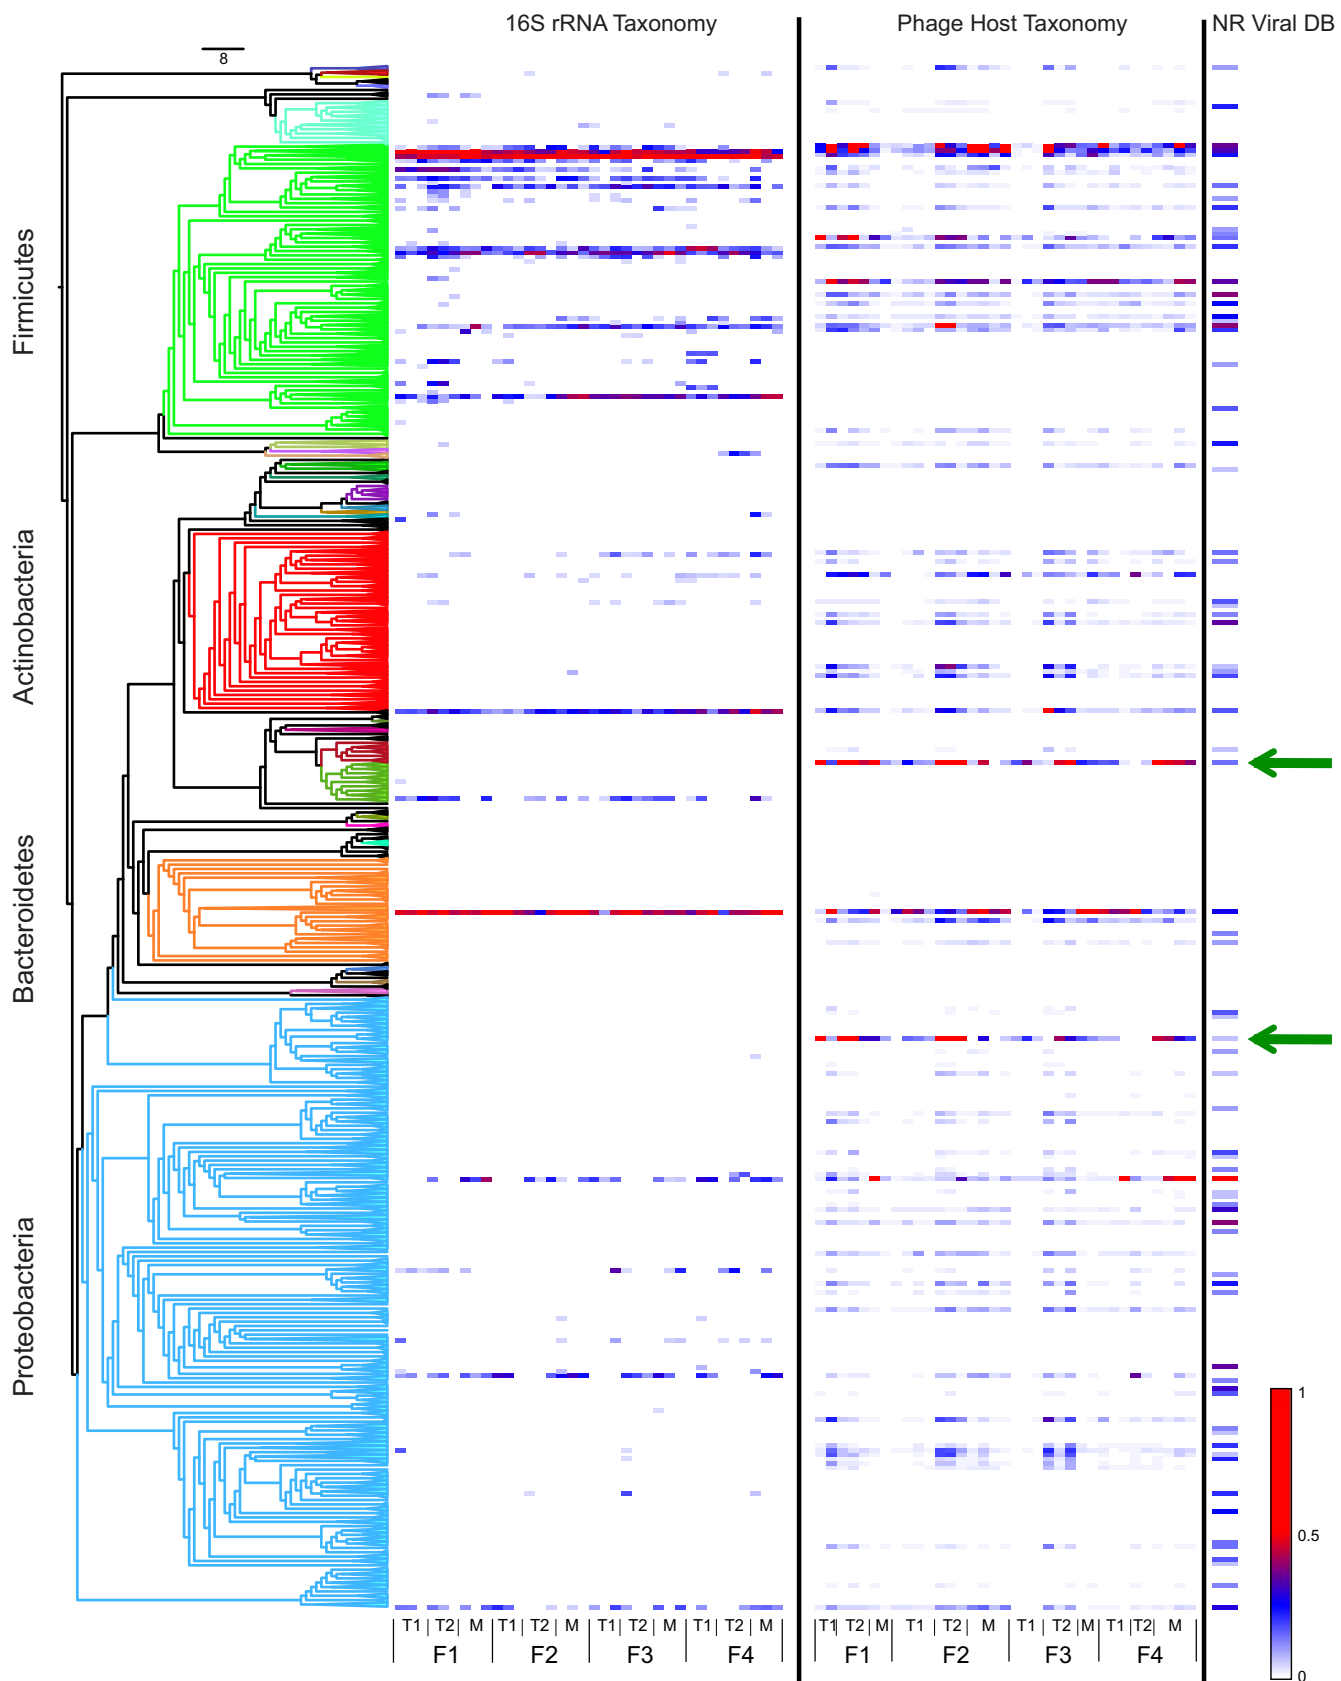

**Fig. S3. Representative Monte Carlo simulations for cross contigs defining intrapersonal vs interpersonal variation in VLP DNA viromes.** Monte Carlo simulations for the percent shared viral genotypes (virotypes) and percent permuted rank abundance of virotypes between pairs of fecal VLP samples. Colors indicate the likelihood score for a given position. Intra-personal variation is displayed in panels a-c: F4T3.2 vs F4T3.3 (a); F2T1.1 vs F2T1.3 (b); F1T2.2 vs F1T2.3 (c). Inter-personal variation is illustrated in panels d-f: F3M vs F3T1 (d); F2T1 vs F2T2 (e); F4T1 vs F4T2 (f).



Reyes *et al.*, Supplementary Fig. 3

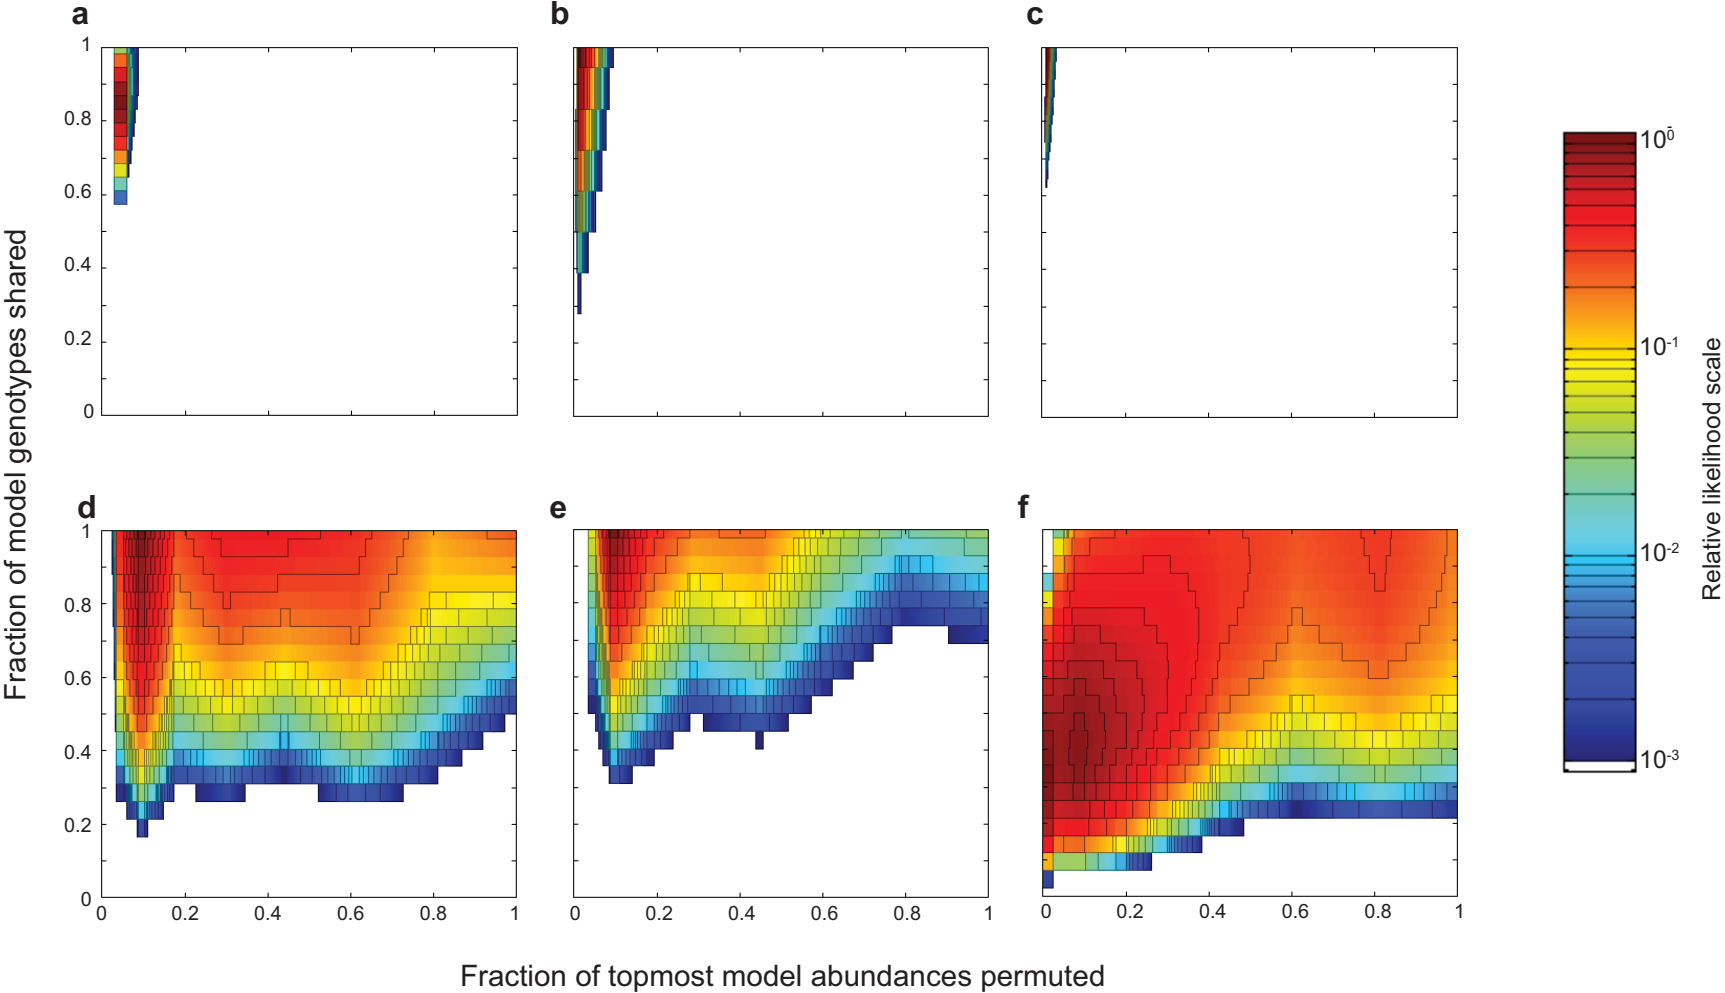

**Fig. S4. Beta-diversity analysis: clustering of fecal VLP-associated viromes and bacterial 16S rRNA data.** Unrooted, jack-knifed (100 iterations) consensus UPGMA trees obtained from Hellinger-based distance matrices are shown for bacterial 16S rRNA data (a) and VLP-derived viromes (b). The color key provides information about the family (F), and family member. Bars represent Hellinger distances.

Reyes *et al.*, Supplementary Fig. 4

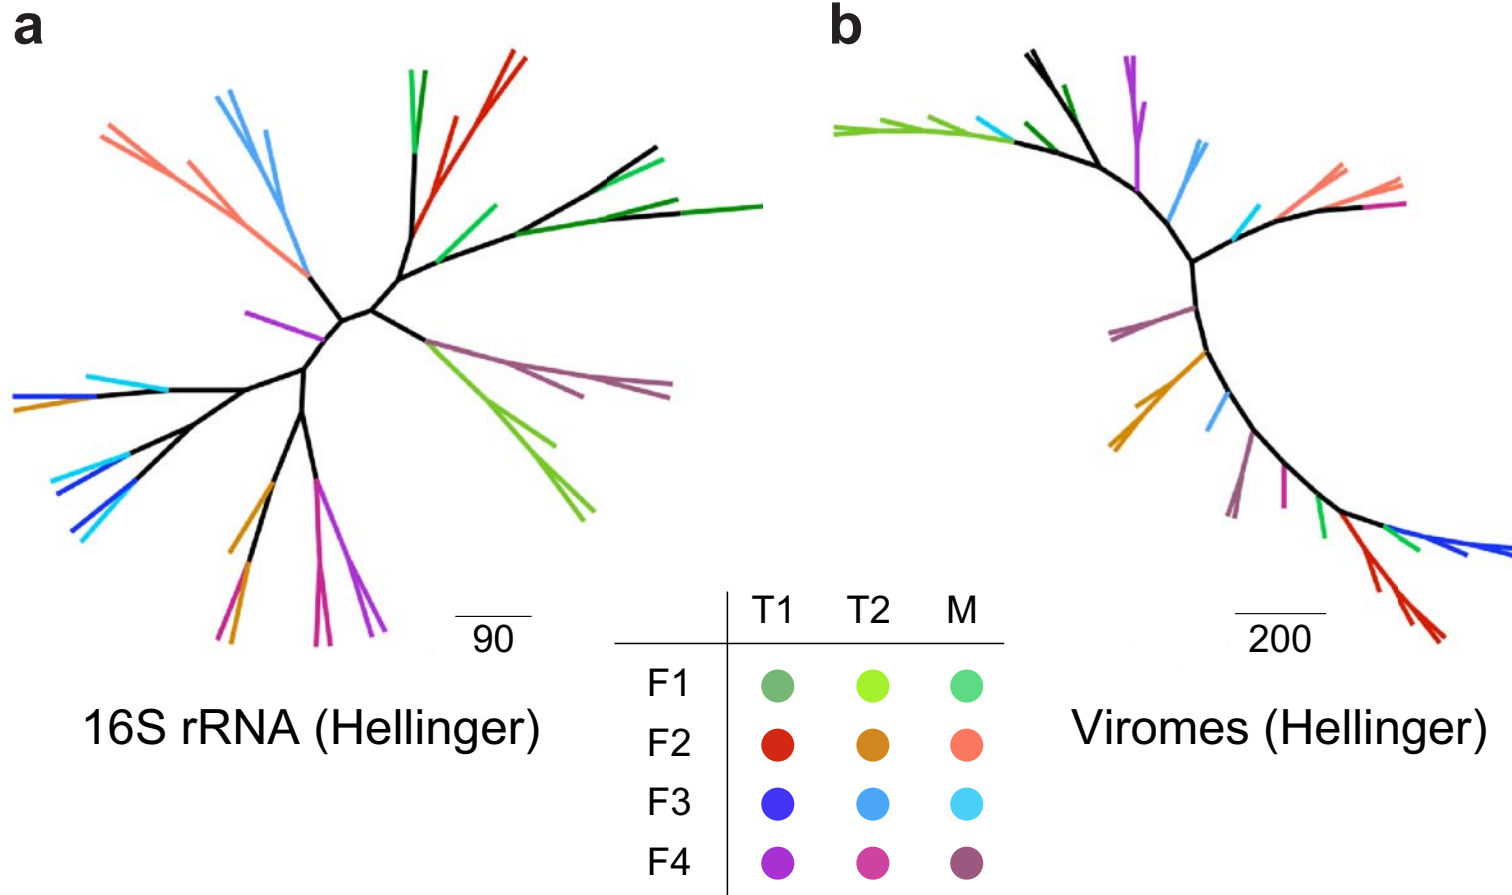

**Fig. S5. Beta-diversity analysis.** Branch support for the trees displayed in **Fig. S4**. Hellinger-based UPGMA trees for bacterial 16S rRNA data and VLP-derived viromes are displayed in panels a and b, respectively. The color key provides information about family (F) and the family member.



**Fig. S6. Percent similarity plots of VLP virome reads mapping to a predicted prophage in *Ruminococcus torques* ATCC 27756.** The genes present within the ~60 Kbp prophage are shown in green, and those present on either strand of the flanking bacterial genome are shown in black at the bottom of the figure. Pyrosequencer reads, generated from fecal VLPs, prepared at 2 or more time points from a co-twin (T2) and her mother (M) belonging to family 2 (F2) and having  $\geq 80\%$  identity with prophage genes, are displayed as blue dots (each dot represents a single read with a hit to the positive strand of the prophage) or red dots (negative strand hits)

Reyes *et al.*, Supplementary Fig. 6

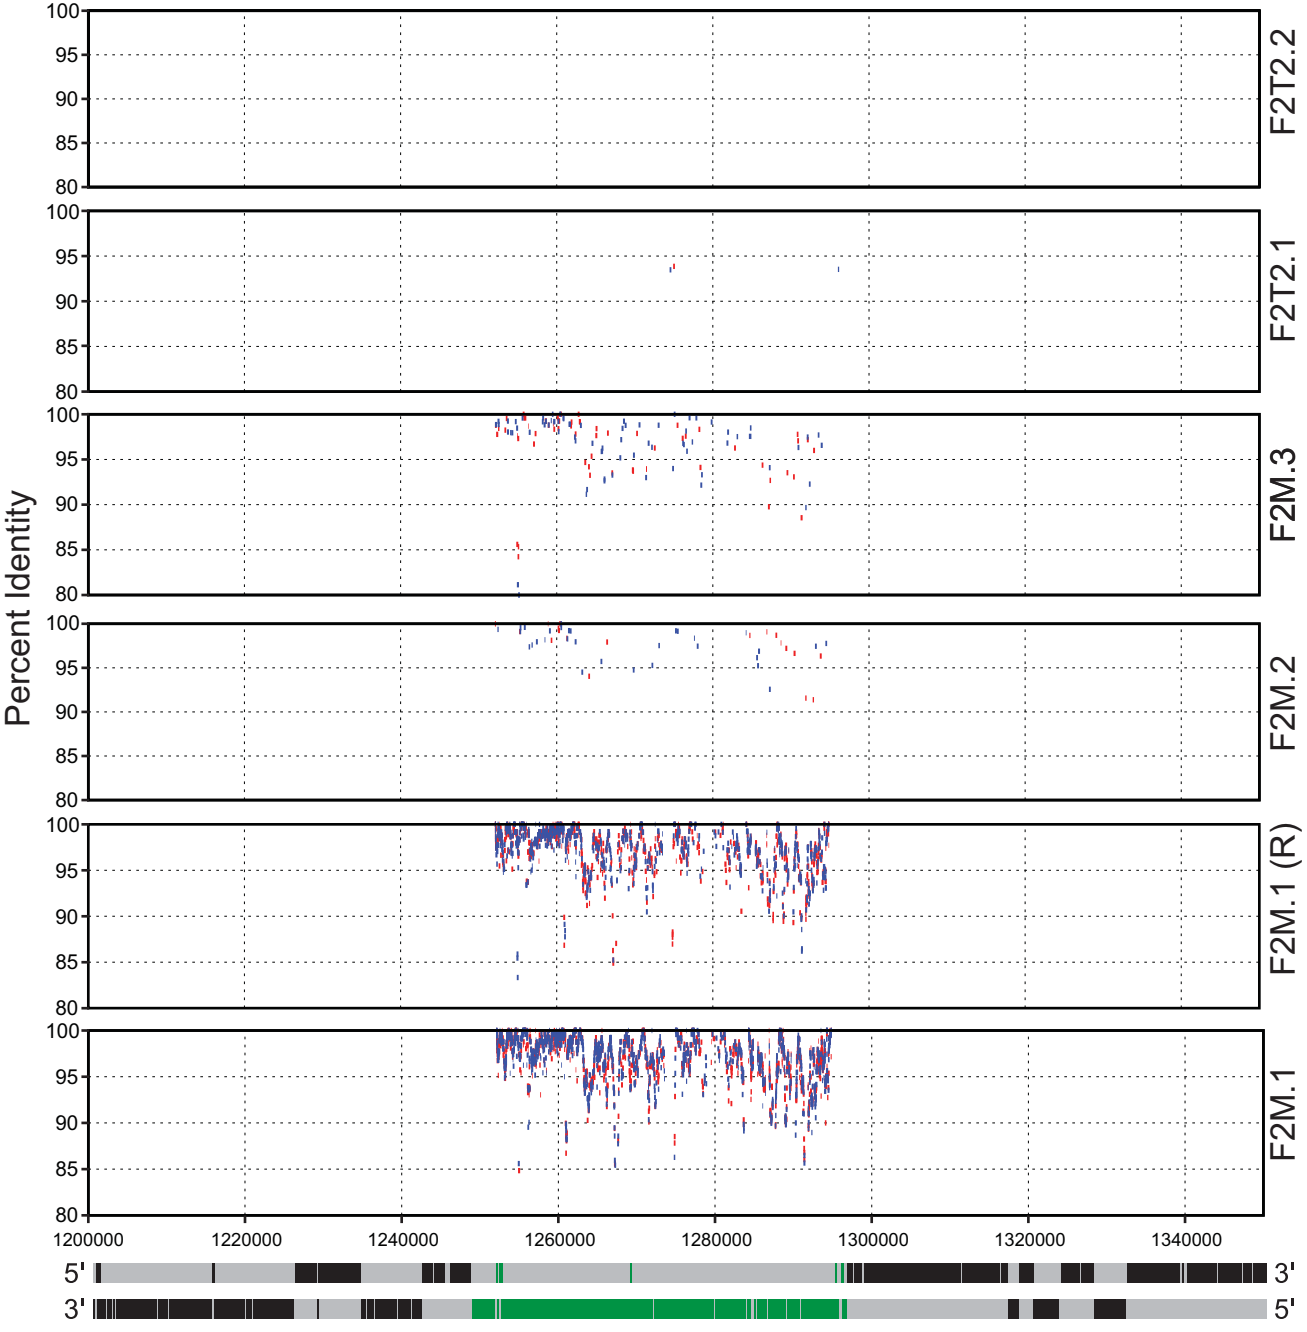

*Ruminococcus torques* ATCC 27756

**Fig. S7. Length distribution of viral contigs assembled from VLP-derived pyrosequencing reads.** A frequency histogram of contig length is shown.



Reyes *et al.*, Supplementary Fig. 7

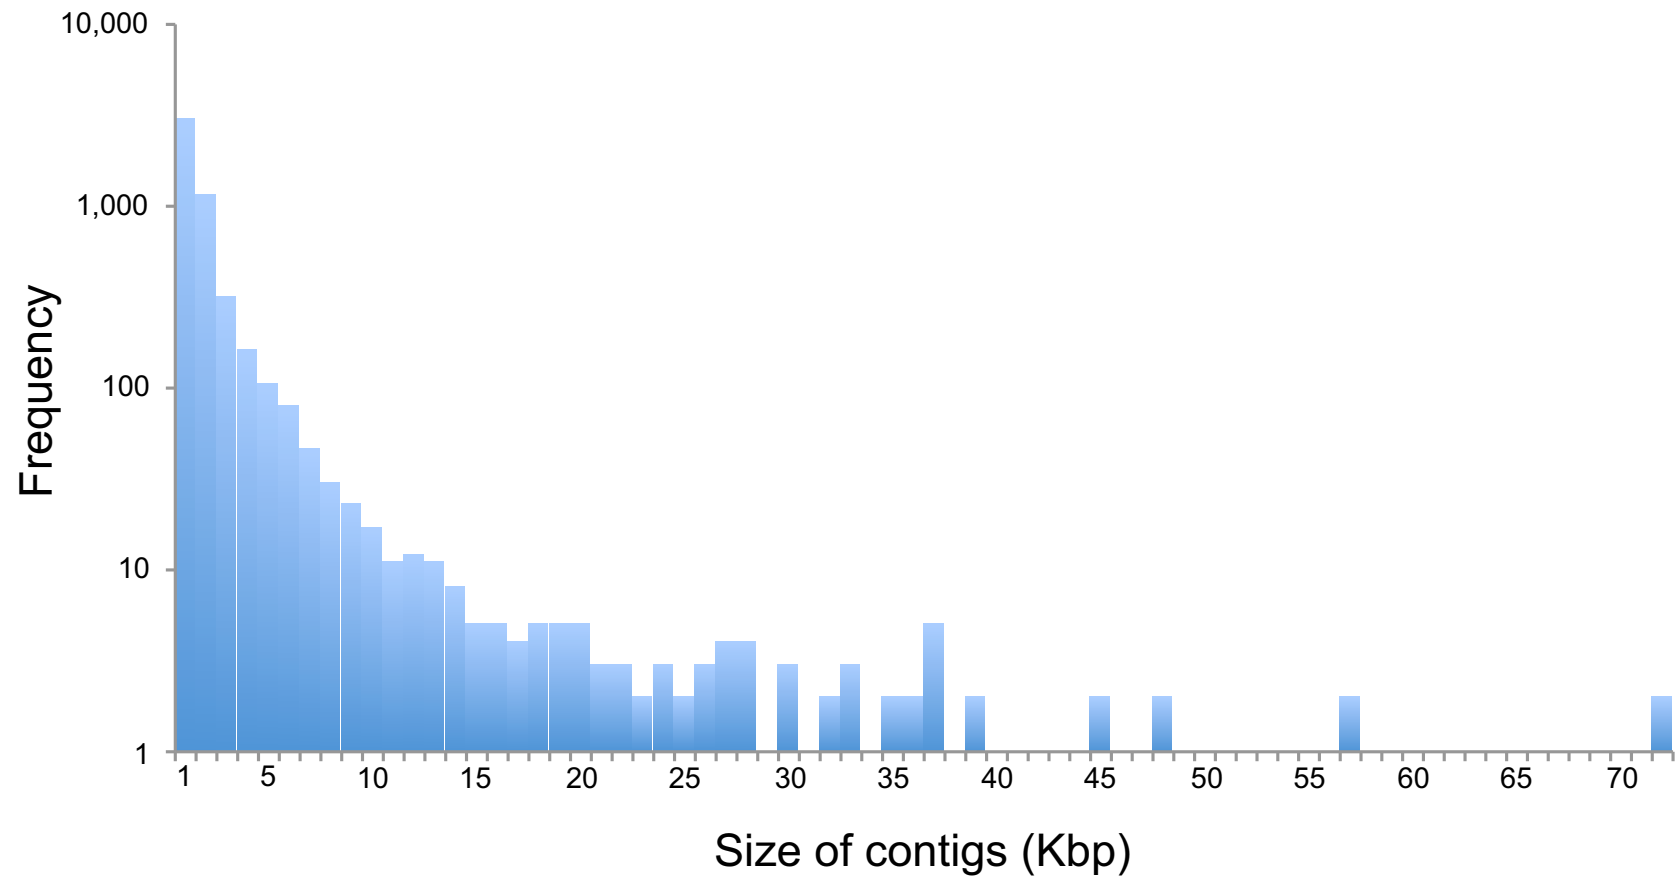

**Fig. S8. Percentage of fecal virome and microbiome reads with significant hits to COG categories and KEGG second level pathways.** Sample by sample percentage of reads with significant hits (blastx, e-value cutoff  $<1e-5$ ) to (a) COG (STRING v7) and (b) KEGG (v44) databases.

**Reyes et al., Supplemental Fig. 8**

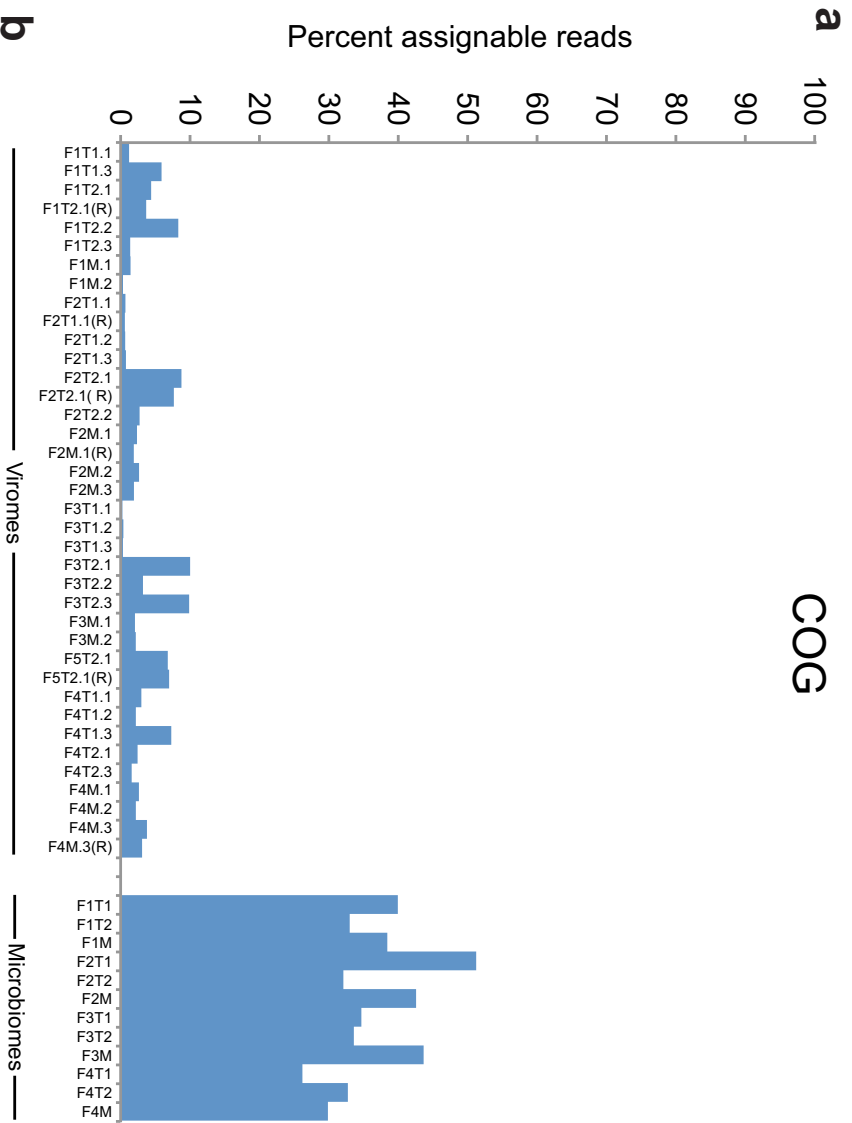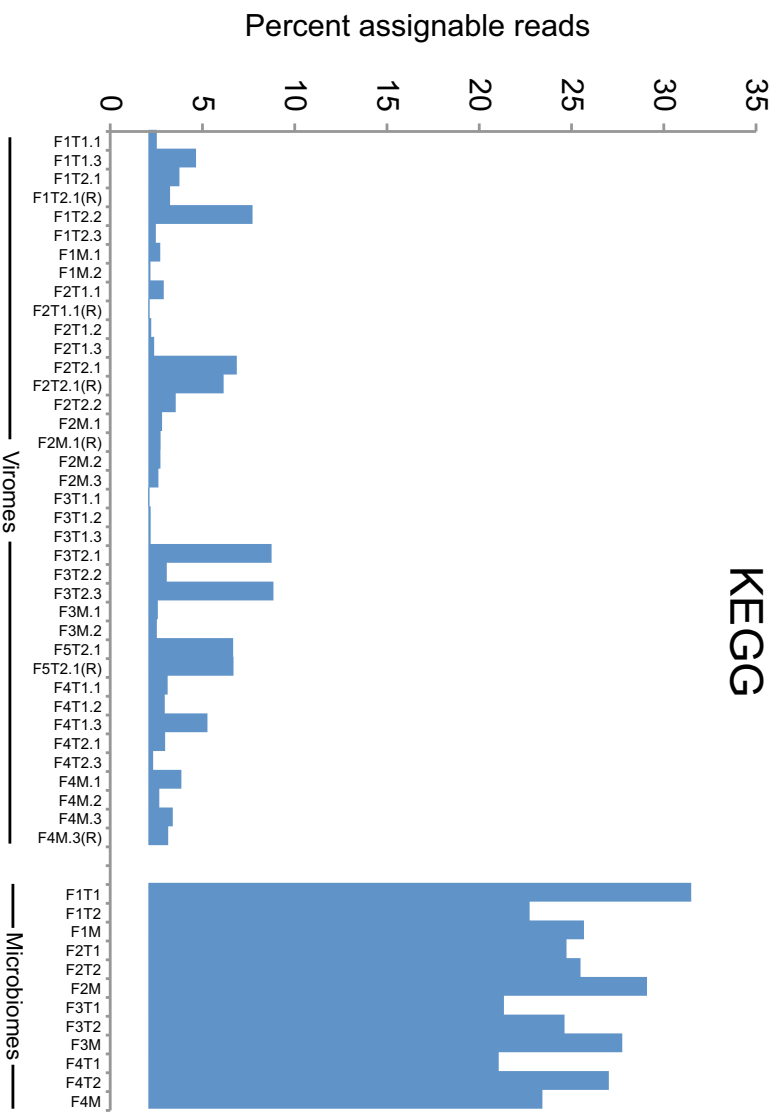

**Fig. S9. KEGG and COG annotations reveal significant differences in functions between fecal VLP-associated viromes and microbiomes.** Only COG-categories (panel a) and KEGG second level pathways (panel b) with significant differences in their representation between fecal microbiomes and VLP-associated viromes are shown (mean  $\pm$  s.e.m plotted;  $p < 0.05$ ; two sample t-test calculated using Metastats).

Reyes *et al.*, Supplementary Fig. 9

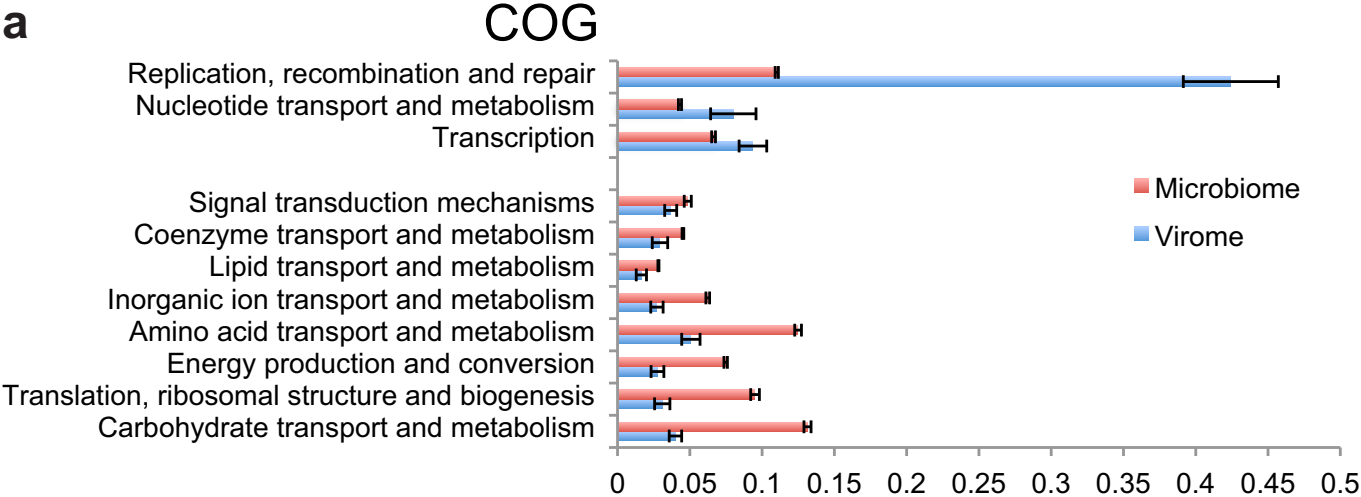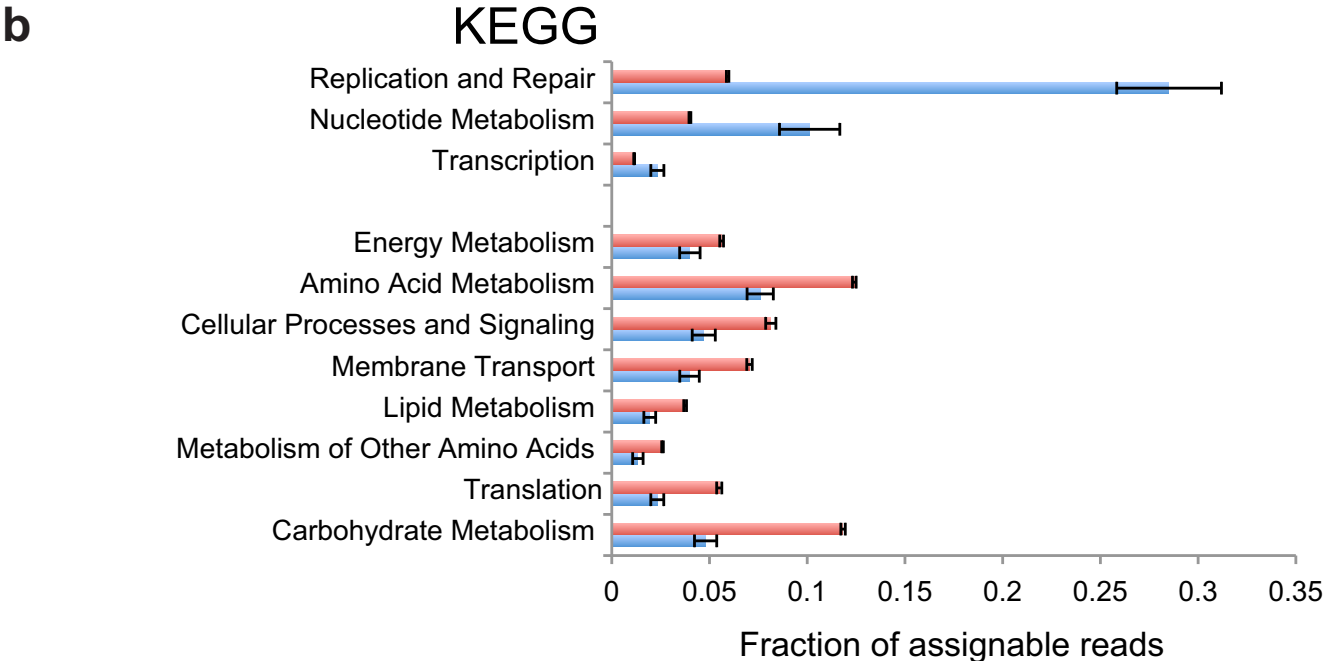

**Fig. S10. A sample-by-sample view of the proportional representation of COG categories in sequenced VLP-associated viromes and gut microbiomes.** Blastx assignment (e-value cutoff  $<1e-5$ ) of reads to functional categories. Shown from top to bottom are proteins from viruses in the NR\_Viral\_DB and fecal VLP-derived viromes, plus proteins from 121 sequenced human gut-associated microbial genomes and fecal microbiomes. See **Fig. 1** for sample nomenclature.

Reyes *et al.*, Supplementary Fig. 10

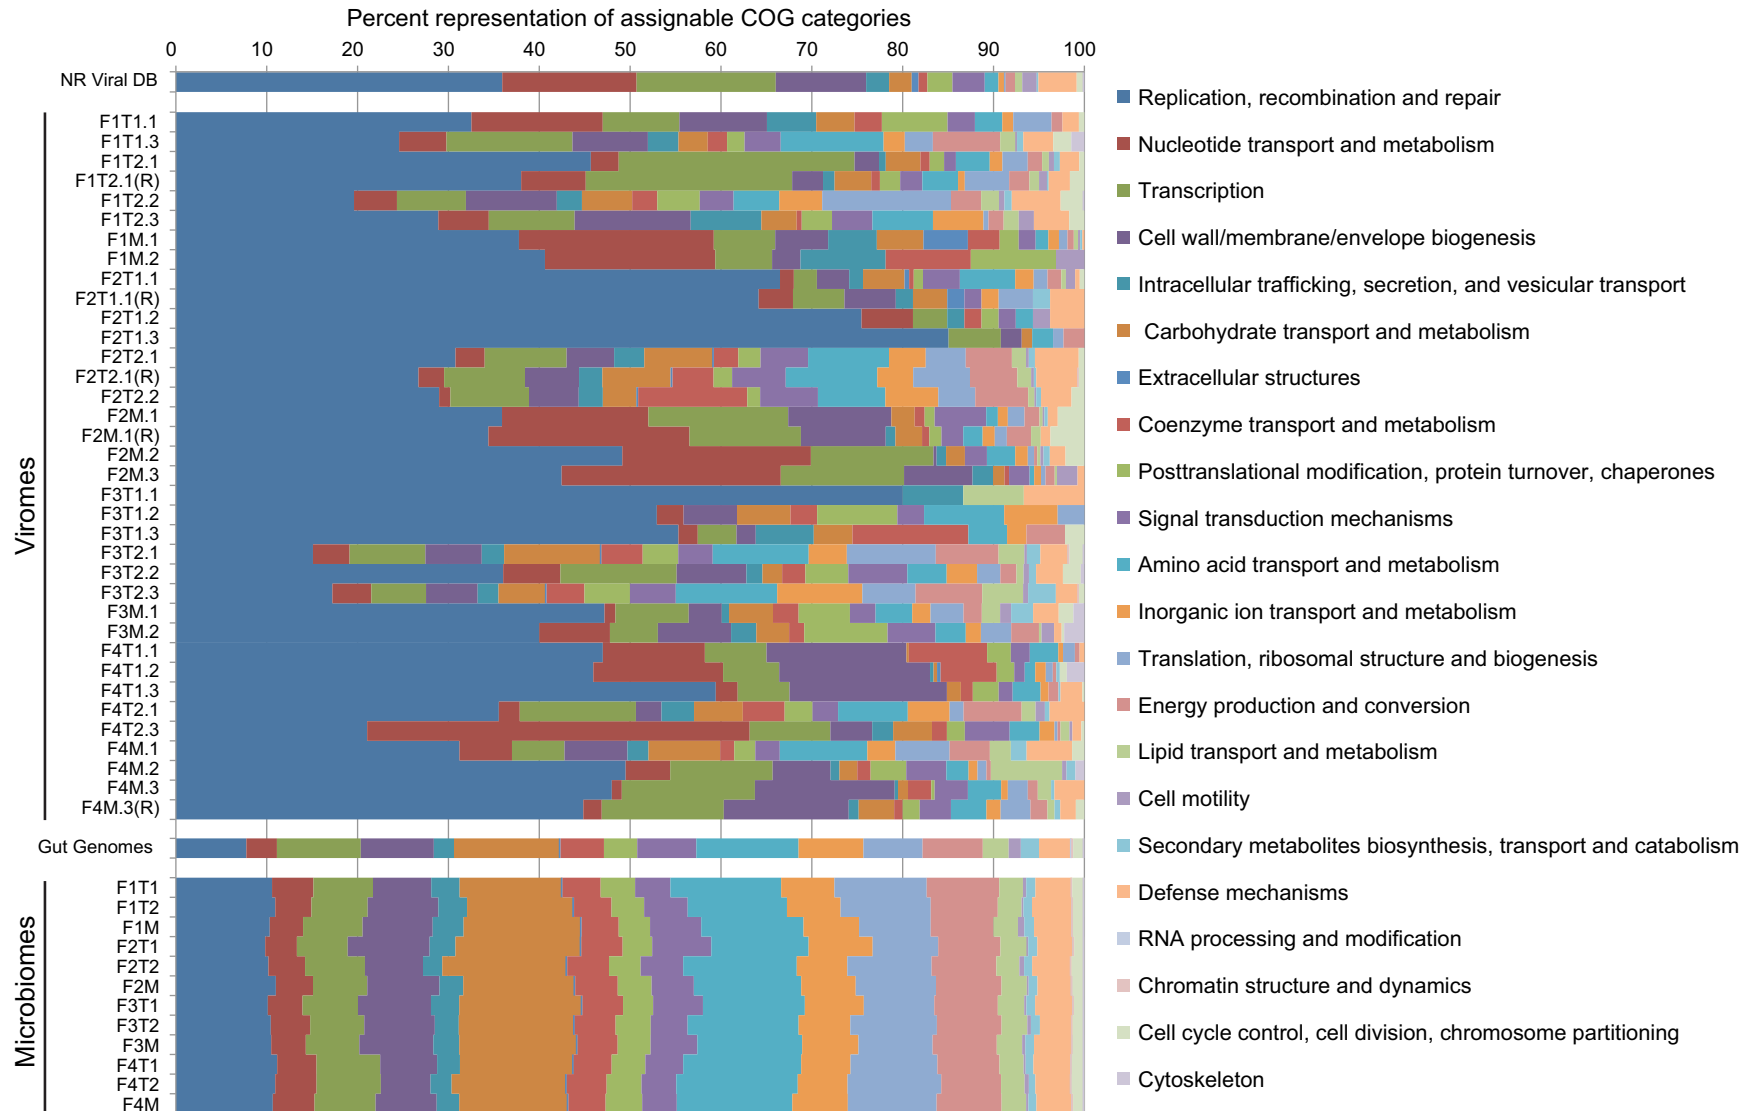

**Fig. S11. Comparison of the representation of KEGG and COG groups in proteins encoded by large VLP-derived contigs and in the NR\_Viral\_DB.** Searches (blastp, e-value  $<1e-5$ ) were performed against the STRING COG database (panel a) and KEGG (results for second level pathways are shown in panel b).



Reyes *et al.*, Supplementary Fig. 11

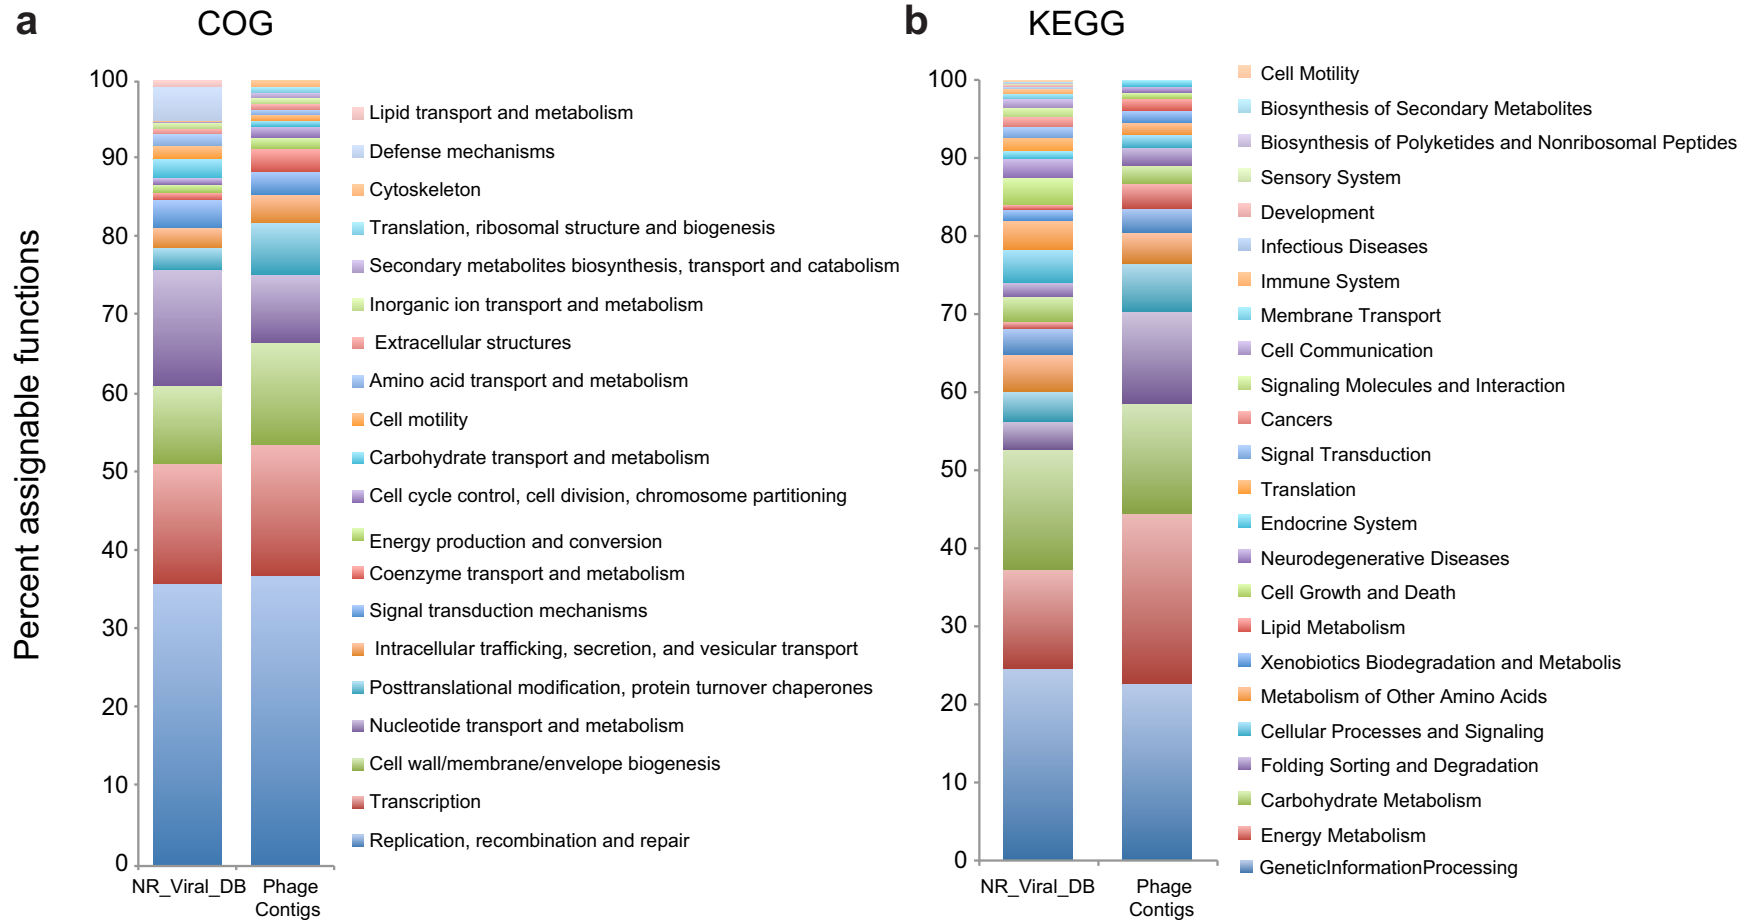

**Fig. 12. Representative phylogenetic trees of bacterial proteins present in large contigs assembled from VLP-viromes with no homologs in the NR\_Viral\_DB.**

Multiple alignment of the indicated viral protein (highlighted in red) with all proteins from 121 human gut microbial genomes that harbored the same domain or motif was performed using Muscle<sup>19</sup>. Approximate maximum likelihood trees were generated using FastTree<sup>20</sup>. Bars represent the number of amino acid substitutions per position.

Reyes *et al.*, Supplementary Fig. 12

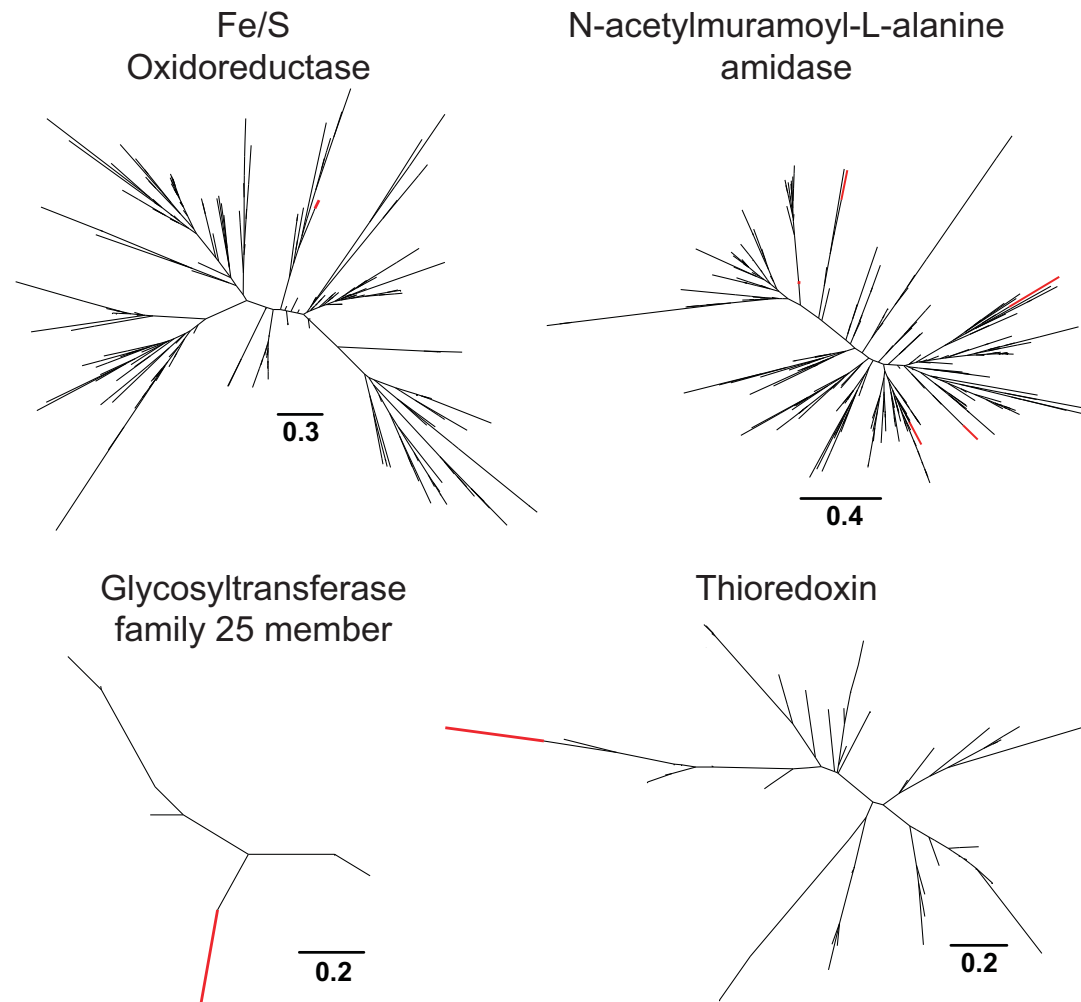

**Fig. S13. Sequence diversity of integrase genes in VLP viromes.** The number of pyrosequencer reads in each VLP sample with significant hits to known integrases present in the NR\_Viral\_DB and in prophages found in 121 human gut microbial genomes were identified and used to generate a distance matrix. Average distances among technical replicates (two shotgun datasets produced from a given VLP DNA preparation), among samples obtained from the same individual over time (intrapersonal variation), and samples obtained from co-twins, twins and their mothers or unrelated individuals, are graphed (mean  $\pm$  s.e.m). The significance of differences between the groups was calculated using Student's t-test. \*\*\*  $p < 0.001$ ; \*\*  $p < 0.01$ , ns,  $p > 0.05$ .

Reyes *et al.*, Supplementary Fig. 13

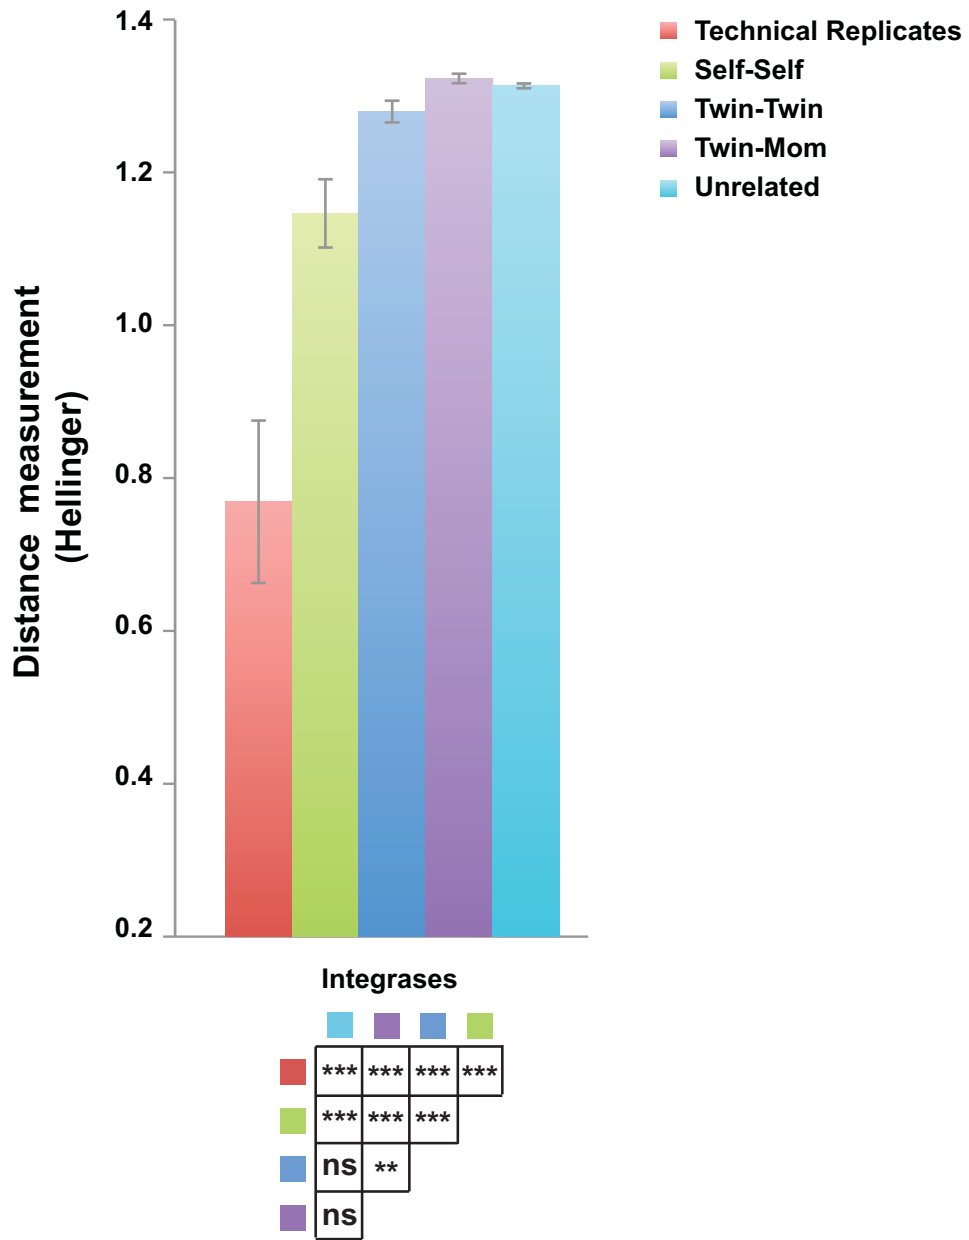

**Fig. S14. Normalized RNA-Seq counts for predicted prophages in *Bacteroides thetaiotaomicron* VPI-5482.** RNA-Seq was performed using rRNA-depleted RNA samples prepared from cecal and fecal contents harvested from gnotobiotic mice co-colonized for 2 weeks with *B. thetaiotaomicron* and *M. formatexigens* (n=3 animals). Expression levels are shown for each ORF (see color key for normalized read counts; normalization based on sequencing effort and length of each predicted ORF). Active expression is defined as a normalized read count >100. This strain of *B. thetaiotaomicron* contains two prophages. One of the prophages (labeled 1) contains a linked pair of highly expressed ORFs encoding an Xre family anti-toxin (BT4733) and a putative toxin (BT4732) while the other prophage contains a cluster of three highly expressed genes [two hypothetical proteins flanking a Xre family anti-toxin (BT4035)].

Reyes *et al.*, Supplementary Fig. 14

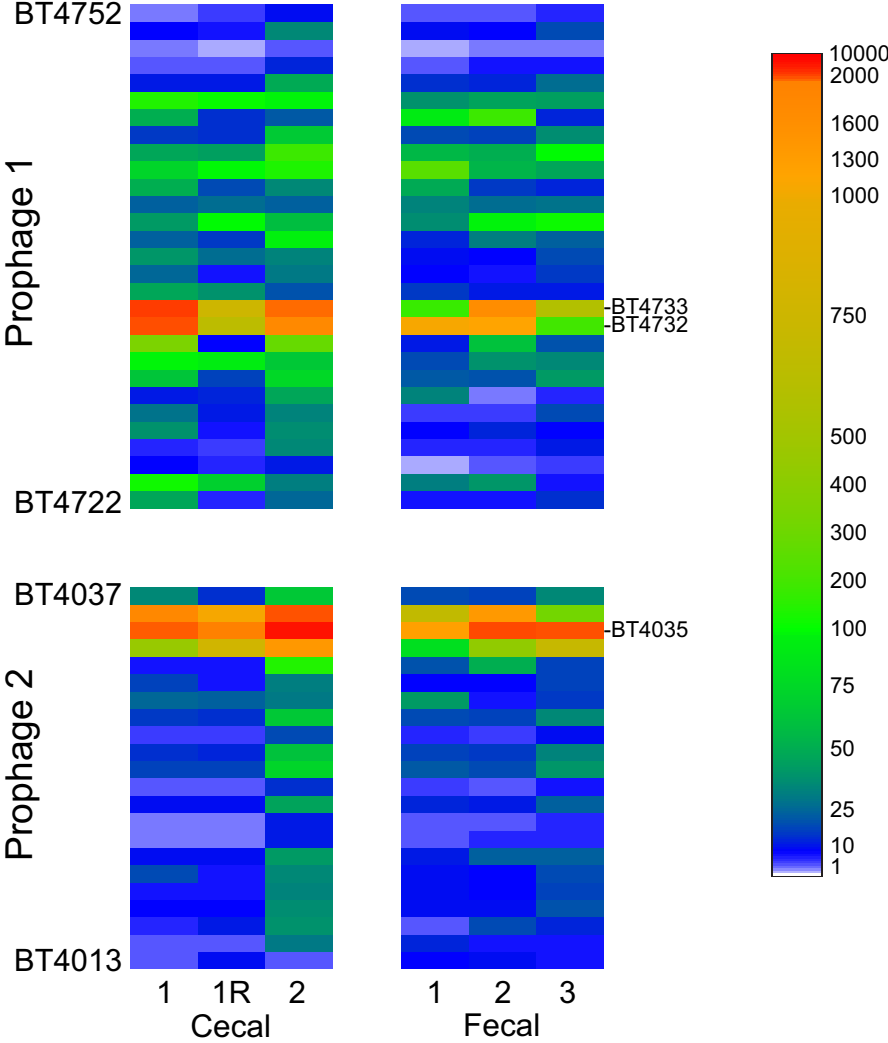

**Fig. S15. Representation of VLP pyrosequencer reads in fecal microbiomes and vice versa.** The percentage of reads from fecal microbiomes with significant similarity to VLP-derived reads (blastn, e-value  $<1e-7$ ) is represented as a blue wedge within the red pie charts. This wedge is expanded to the right in the form a second blue pie chart that shows the percentage of reads from each of the different time point VLP preparations that have significant similarity with reads from the fecal microbiome from time point 1. (a) The percentage of shared reads between the deeply sequenced F5T2 VLP preparation and corresponding deeply sequenced fecal microbiome (293,654 and 2,579,680 reads, respectively). (b) Data derived from shallowly sequenced fecal viromes and microbiomes.



Reyes *et al.*, Supplementary Fig. 15

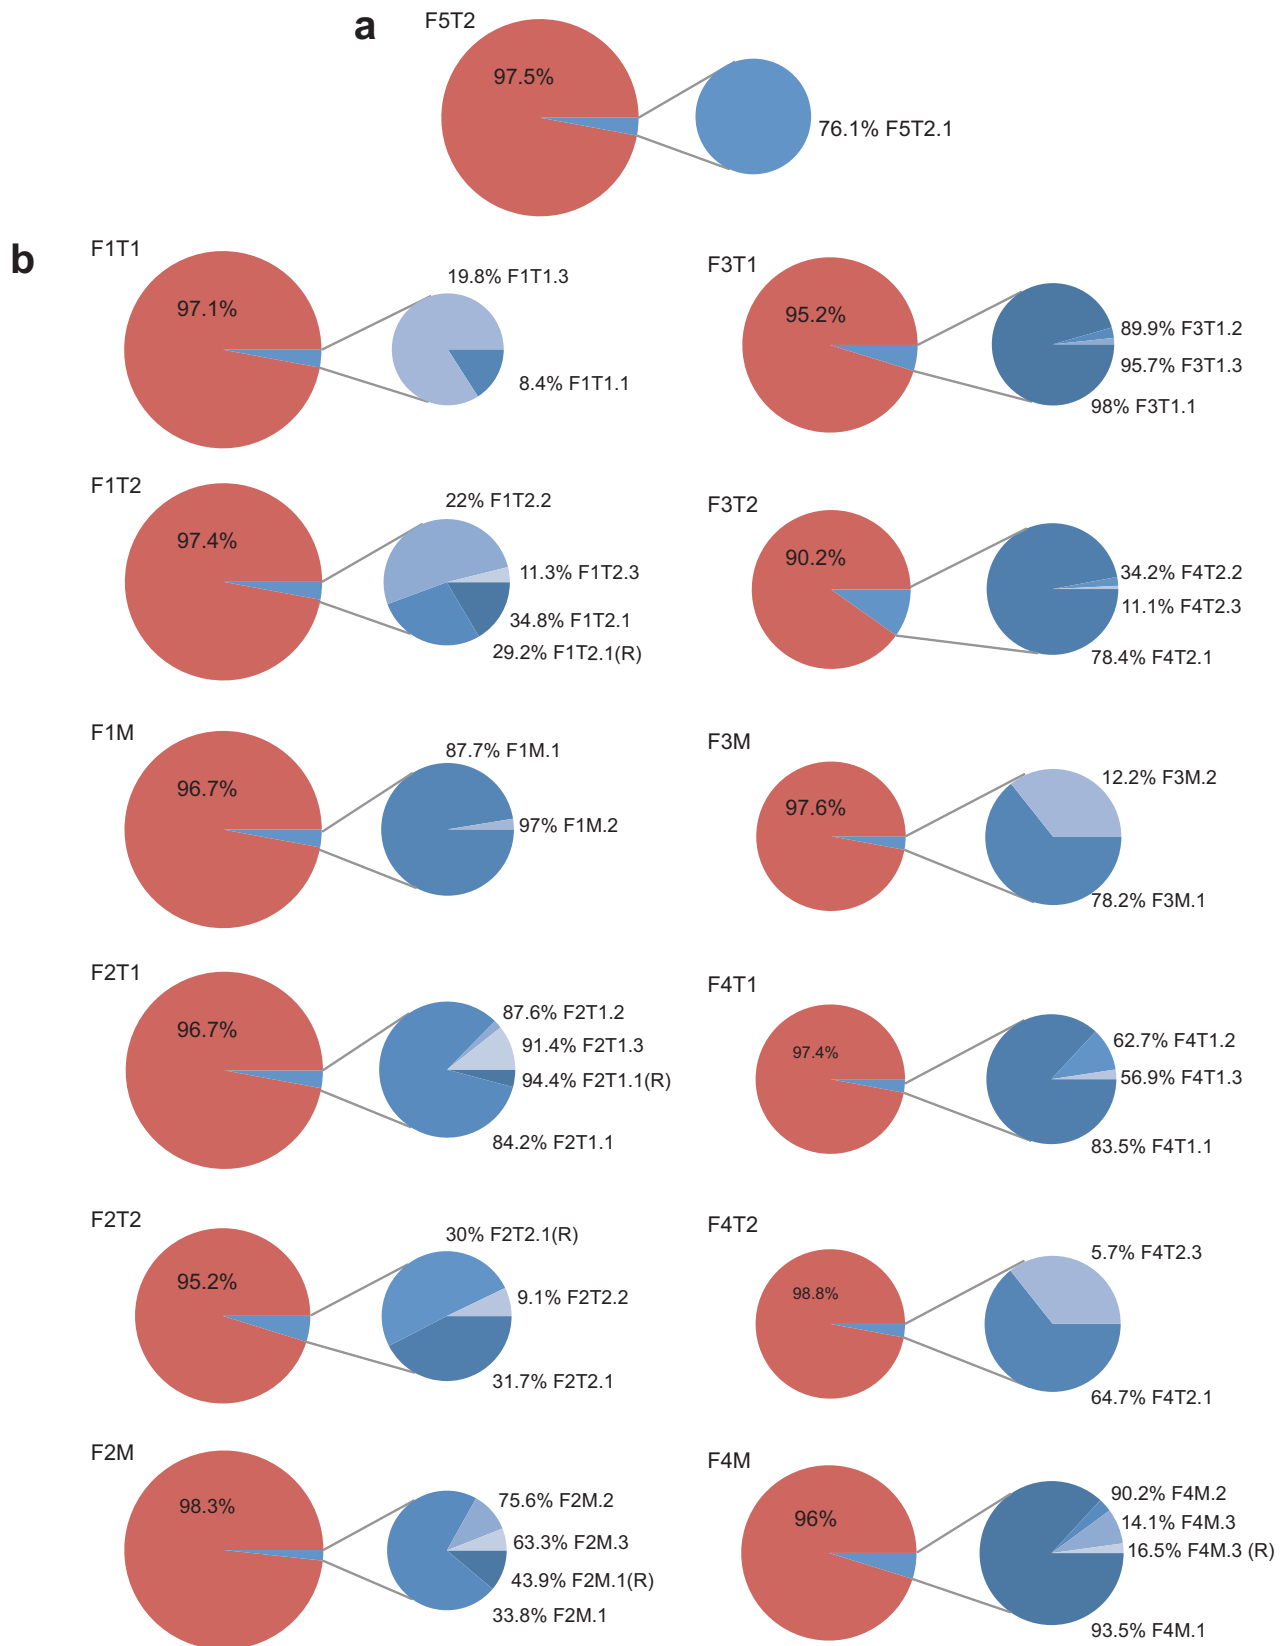

## Supplementary Tables

**Table S1. Sequencing effort for VLP preparations from 32 fecal samples obtained from 4 sets of MZ twins and their mothers.** Technical replicates were performed on 6 DNA samples involving independent whole genome amplification and shotgun 454 FLX pyrosequencing. Sample F5T2.1 was subjected to deeper sequencing. NA, a fecal specimen was not available in sufficient quantity to purify VLPs at this time point.

**Table S2. Sequencing effort for bacterial 16S rRNA genes present in the fecal microbiota of study participants.**

**Table S3. Shotgun sequencing effort for fecal community DNA (microbiome) samples.**

**Table S4. CD-hit cluster-based alpha diversity metrics.**

**Table S5. PHACCS-based alpha diversity metrics.**

**Table S6. Matrix of VLP samples x reference human microbial gut genomes where significant coverage to prophages in the microbial host was identified.** (a) Percent of the prophage genome covered by reads from a given VLP sample. (b) Fold coverage per bp of the prophage genome, normalized to 10,000 reads. Yellow highlights instances where the prophage was covered over more than 50% of its length.

**Table S7. Matrix of VLP samples x the 88 large contigs assembled from the aggregate VLP dataset showing (a) the percentage of the contig covered by reads from a given VLP sample and (b) fold-coverage per bp of each contig.** Data are

normalized by randomly mapping 14,000 reads per VLP sample. Yellow highlights instances where a given contig has  $\geq 50\%$  coverage with reads from a given VLP virome.

**Table S8. Contig x VLP sample matrix of contigs present in more than one VLP sample.** The percent identity between VLP-pyrosequencer reads and the corresponding contig is shown. Dashes indicate that no reads corresponding to the contig were present in the VLP sample (threshold; minimum of 80% overlap with the contig over the length of the read)

**Table S9. List of 121 sequenced human gut-derived microbial genomes used for generating a reference list of KEGG second level pathways and COG assignments.** The presence or absence of CRISPRs in the genomes of the 74 organisms used to search for these elements is noted.

**Table S10. List of 396 sequenced microbial genomes used to identify prophage sequences for the NR\_Viral\_DB.**

**Table S11. The number of VLP reads with similarity over more than 90% of their length to CRISPR spacers present in either the fecal microbiome of the same individual or in a reference gut-associated microbial genome.** Counts are normalized (10,000 reads per sample). The bottom row shows the number of spacers identified in each fecal microbiome sample (see *Supplementary Discussion* for further definition of the criteria used to select spacers from the fecal microbiome datasets to query VLP datasets).

**Table S1. Shotgun pyrosequencing of DNA purified from fecal VLPs**

**Number of reads per dataset**

| Family | Family Member | Time.1 | Time.2 | Time.3 |
|--------|---------------|--------|--------|--------|
| F1     | T1            | 23,284 | NA     | 43,609 |
|        | T2            | 43,350 | 31,045 | 28,044 |
|        | M             | 48,769 | 24,498 | NA     |
| F2     | T1            | 71,432 | 40,414 | 26,634 |
|        | T2            | 40,932 | 36,319 | NA     |
|        | M             | 58,379 | 27,647 | 35,561 |
| F3     | T1            | 18,578 | 19,866 | 30,441 |
|        | T2            | 53,410 | 33,807 | 28,922 |
|        | M             | 25,098 | 37,697 | NA     |
| F4     | T1            | 24,563 | 20,674 | 14,483 |
|        | T2            | 27,937 | NA     | 30,013 |
|        | M             | 24,980 | 23,731 | 30,207 |
| F5     | T2            | 48,432 |        |        |

**Replicates**

|    |      |         |
|----|------|---------|
| F4 | M.3  | 16,081  |
| F1 | T2.1 | 30,141  |
| F2 | T1.1 | 19,506  |
| F2 | T2.1 | 41,719  |
| F2 | M.1  | 34,012  |
| F5 | T2.1 | 245,222 |

**Number of nucleotides per dataset**

| Family | Family Member | Time.1     | Time.2    | Time.3     |
|--------|---------------|------------|-----------|------------|
| F1     | T1            | 5,480,138  | NA        | 10,439,191 |
|        | T2            | 10,319,498 | 7,278,429 | 6,663,475  |
|        | M             | 11,874,381 | 6,013,335 | NA         |
| F2     | T1            | 17,244,379 | 9,845,469 | 6,560,103  |
|        | T2            | 9,684,954  | 8,812,248 | NA         |
|        | M             | 14,173,440 | 6,637,882 | 8,597,871  |
| F3     | T1            | 4,487,018  | 4,788,497 | 7,333,512  |
|        | T2            | 12,609,532 | 8,164,157 | 6,950,693  |
|        | M             | 6,019,033  | 9,106,849 | NA         |
| F4     | T1            | 5,949,161  | 4,919,740 | 3,437,755  |
|        | T2            | 6,772,788  | NA        | 7,115,420  |
|        | M             | 5,934,901  | 5,652,431 | 7,365,500  |
| F5     | T2            | 11,712,401 |           |            |

**Replicates**

|    |      |            |
|----|------|------------|
| F4 | M.3  | 3,931,490  |
| F1 | T2.1 | 7,360,504  |
| F2 | T1.1 | 4,747,264  |
| F2 | T2.1 | 10,056,492 |
| F2 | M.1  | 8,297,597  |
| F5 | T2.1 | 58,444,932 |

**Table S2. Pyrosequencing effort for 16S rRNA V2 region amplicons**

**Number of reads per dataset**

| Family | Family Member | Time.1 | Time.2 | Time.3 |
|--------|---------------|--------|--------|--------|
| F1     | T1            | 6,415  | 1,627  | 40,583 |
|        | T2            | 15,495 | 1,957  | 2,074  |
|        | M             | 7,870  | 1,799  | 2,816  |
| F2     | T1            | 9,343  | 2,886  | 3,030  |
|        | T2            | 13,991 | 3,606  | 2,562  |
|        | M             | 7,717  | 4,325  | 3,350  |
| F3     | T1            | 9,837  | 3,953  | 10,392 |
|        | T2            | 19,586 | 5,045  | 2,417  |
|        | M             | 15,294 | 4,752  | 30,294 |
| F4     | T1            | 11,936 | 4,220  | 1,588  |
|        | T2            | 12,672 | 4,603  | 1,856  |
|        | M             | 13,789 | 3,284  | 3,071  |

**Table S3. Shotgun pyrosequencing effort for fecal community DNA (microbiome) samples**

**Number of reads per dataset**

| Family | Family Member | Time.1    |
|--------|---------------|-----------|
| F1     | T1            | 217,386   |
|        | T2            | 443,640   |
|        | M             | 510,972   |
| F2     | T1            | 414,754   |
|        | T2            | 490,776   |
|        | M             | 535,763   |
| F3     | T1            | 498,880   |
|        | T2            | 495,040   |
|        | M             | 413,772   |
| F4     | T1            | 519,072   |
|        | T2            | 549,700   |
|        | M             | 434,187   |
| F5     | T2            | 2,579,680 |

**Number of nucleotides per dataset**

| Family | Family Member | Time.1      |
|--------|---------------|-------------|
| F1     | T1            | 51,926,180  |
|        | T2            | 79,297,532  |
|        | M             | 103,228,389 |
| F2     | T1            | 95,417,867  |
|        | T2            | 101,090,755 |
|        | M             | 118,742,924 |
| F3     | T1            | 82,616,445  |
|        | T2            | 98,548,138  |
|        | M             | 89,199,789  |
| F4     | T1            | 92,506,950  |
|        | T2            | 112,549,303 |
|        | M             | 81,764,398  |
| F5     | T2            | 910,456,203 |

**Table S4. CD-hit cluster-based alpha diversity metrics**

|          |           | Sample | Cluster Shannon Index | Expected #Clusters | Average Genome Size | Expected #Virotypes |
|----------|-----------|--------|-----------------------|--------------------|---------------------|---------------------|
| Family 1 | Co-twin 1 | 1      | 10.94                 | 56327              | 5594                | 403                 |
|          |           | 3      | 13.39                 | 653728             | 34025               | 769                 |
|          |           | 1      | 11.59                 | 108486             | 11863               | 366                 |
|          | Co-twin 2 | 1(R)   | 12.24                 | 207752             | 14533               | 572                 |
|          |           | 2      | 13.64                 | 838359             | 12091               | 2773                |
|          |           | 3      | 12.31                 | 221107             | 19716               | 449                 |
|          | Mother    | 1      | 12.66                 | 315416             | 73725               | 171                 |
| 2        |           | 11.22  | 74731                 | 42095              | 71                  |                     |
| Family 2 | Co-twin 1 | 1      | 12.00                 | 163342             | 30437               | 215                 |
|          |           | 1(R)   | 11.72                 | 122634             | 49931               | 98                  |
|          |           | 2      | 11.98                 | 160020             | 43526               | 147                 |
|          |           | 3      | 11.91                 | 149282             | 47792               | 125                 |
|          | Co-twin 2 | 1      | 13.09                 | 482461             | 9908                | 1948                |
|          |           | 1(R)   | 13.43                 | 682963             | 15585               | 1753                |
|          |           | 2      | 12.56                 | 285882             | 7552                | 1514                |
|          | Mother    | 1      | 13.13                 | 503089             | 32162               | 626                 |
|          |           | 1(R)   | 13.22                 | 552748             | 38326               | 577                 |
|          |           | 2      | 12.66                 | 315897             | 49478               | 255                 |
|          |           | 3      | 12.83                 | 374537             | 32373               | 463                 |
| Family 3 | Co-twin 1 | 1      | 11.11                 | 66702              | 51239               | 52                  |
|          |           | 2      | 11.27                 | 78619              | 31767               | 99                  |
|          |           | 3      | 11.02                 | 60812              | 43052               | 57                  |
|          | Co-twin 2 | 1      | 13.19                 | 536799             | 43499               | 494                 |
|          |           | 2      | 12.32                 | 224460             | 30704               | 292                 |
|          |           | 3      | 13.60                 | 803043             | 20416               | 1573                |
|          | Mother    | 1      | 11.82                 | 136453             | 36091               | 151                 |
|          |           | 2      | 12.07                 | 174413             | 27692               | 252                 |
| Family 4 | Co-twin 1 | 1      | 12.52                 | 274276             | 28033               | 391                 |
|          |           | 2      | 11.71                 | 121210             | 26193               | 185                 |
|          |           | 3      | 11.66                 | 115724             | 39954               | 116                 |
|          | Co-twin 2 | 1      | 12.47                 | 259988             | 31832               | 327                 |
|          |           | 3      | 11.71                 | 121545             | 45812               | 106                 |
|          |           | 1      | 12.73                 | 338213             | 14954               | 905                 |
|          | Mother    | 2      | 12.22                 | 202101             | 27135               | 298                 |
|          |           | 3      | 12.62                 | 304012             | 31133               | 391                 |
|          |           | 3(R)   | 12.15                 | 188697             | 29101               | 259                 |
| Family 5 | Co-twin 2 | 1      | 13.49                 | 725374             | 33678               | 862                 |
|          |           | 1(R)   | 13.85                 | 1034661            | 33940               | 1219                |

**Table S5. PHACCS-based alpha diversity metrics**

|          |           | Sample | Shannon Index | Evenness | Richness |
|----------|-----------|--------|---------------|----------|----------|
| Family 1 | Co-twin 1 | 1      | 3.72          | 0.90     | 62       |
|          |           | 3      | 4.22          | 0.87     | 131      |
|          |           | 1      | 3.68          | 0.91     | 60       |
|          | Co-twin 2 | 2      | 5.24          | 0.83     | 536      |
|          |           | 3      | 3.37          | 0.94     | 37       |
|          |           | 1      | 3.82          | 0.69     | 245      |
| Mother   | 2         | 4.09   | 0.66          | 490      |          |
|          |           |        |               |          |          |
| Family 2 | Co-twin 1 | 1      | 2.19          | 0.98     | 10       |
|          |           | 2      | 2.28          | 0.97     | 11       |
|          |           | 3      | 2.99          | 0.84     | 127      |
|          | Co-twin 2 | 1      | 4.51          | 0.92     | 138      |
|          |           | 2      | 4.07          | 0.95     | 71       |
|          |           | 1      | 3.57          | 0.92     | 50       |
|          | Mother    | 2      | 2.71          | 0.95     | 18       |
|          |           | 3      | 2.85          | 0.95     | 20       |
|          |           |        |               |          |          |
| Family 3 | Co-twin 1 | 1      | 2.29          | 0.97     | 11       |
|          |           | 2      | 2.46          | 0.97     | 13       |
|          |           | 3      | 3.46          | 0.78     | 984      |
|          | Co-twin 2 | 1      | 3.72          | 0.85     | 78       |
|          |           | 2      | 3.02          | 0.92     | 28       |
|          |           | 3      | 4.25          | 0.92     | 102      |
|          | Mother    | 1      | 2.84          | 0.96     | 19       |
|          |           | 2      | 2.93          | 0.96     | 21       |
|          |           |        |               |          |          |
| Family 4 | Co-twin 1 | 1      | 3.31          | 0.94     | 34       |
|          |           | 2      | 3.34          | 0.94     | 35       |
|          |           | 3      | 2.62          | 0.92     | 18       |
|          | Co-twin 2 | 1      | 2.83          | 0.96     | 19       |
|          |           | 3      | 2.61          | 0.96     | 15       |
|          |           | 1      | 3.40          | 0.97     | 33       |
|          | Mother    | 2      | 3.18          | 0.97     | 27       |
|          |           | 3      | 3.23          | 0.91     | 36       |











Table S8. Percent similarity between reads in VLP samples and 88 large viral contigs

| Sample       | Family 1  |   |           |       |        |       | Family 2  |       |           |       |        |       | Family 3  |       |           |       |        |   | Family 4  |   |           |       |        |       |
|--------------|-----------|---|-----------|-------|--------|-------|-----------|-------|-----------|-------|--------|-------|-----------|-------|-----------|-------|--------|---|-----------|---|-----------|-------|--------|-------|
|              | Co-twin 1 |   | Co-twin 2 |       | Mother |       | Co-twin 1 |       | Co-twin 2 |       | Mother |       | Co-twin 1 |       | Co-twin 2 |       | Mother |   | Co-twin 1 |   | Co-twin 2 |       | Mother |       |
|              | 1         | 3 | 1         | 2     | 3      | 1     | 2         | 1     | 2         | 3     | 1      | 2     | 3         | 1     | 2         | 3     | 1      | 2 | 1         | 2 | 3         | 1     | 2      | 3     |
| Contig_255   | -         | - | 99.75     | -     | -      | -     | -         | -     | -         | -     | -      | -     | -         | -     | -         | -     | -      | - | -         | - | -         | -     | -      | -     |
| Contig_381   | -         | - | 99.81     | 99.78 | -      | -     | -         | -     | -         | -     | -      | -     | -         | -     | -         | -     | -      | - | -         | - | -         | -     | -      | -     |
| Contig_389   | -         | - | 99.85     | 99.82 | 99.41  | -     | -         | -     | -         | -     | -      | -     | -         | -     | -         | -     | -      | - | -         | - | -         | -     | -      | -     |
| Contig_396   | -         | - | 99.77     | 99.77 | 99.53  | -     | -         | -     | -         | -     | -      | -     | -         | -     | -         | -     | -      | - | -         | - | -         | -     | -      | -     |
| Contig_378   | -         | - | 99.81     | 99.79 | 99.66  | -     | -         | -     | -         | -     | -      | -     | -         | -     | -         | -     | -      | - | -         | - | -         | -     | -      | -     |
| Contig_384   | -         | - | 99.86     | 99.80 | 99.93  | -     | -         | -     | -         | -     | -      | -     | -         | -     | -         | -     | -      | - | -         | - | -         | -     | -      | -     |
| Contig_1233  | -         | - | 99.82     | 99.82 | 99.83  | -     | -         | 88.16 | 87.96     | 88.03 | -      | -     | -         | -     | -         | -     | -      | - | -         | - | -         | -     | -      | -     |
| Contig_20922 | -         | - | 99.83     | 99.81 | 99.83  | -     | -         | 88.09 | 88.06     | 88.05 | -      | -     | -         | -     | -         | -     | -      | - | -         | - | -         | -     | -      | -     |
| Contig_20743 | -         | - | -         | -     | -      | 99.84 | -         | -     | -         | -     | -      | -     | -         | -     | -         | -     | -      | - | -         | - | 92.87     | -     | -      | -     |
| Contig_424   | -         | - | -         | -     | -      | 99.79 | -         | -     | -         | -     | -      | -     | -         | -     | -         | -     | -      | - | -         | - | -         | -     | -      | -     |
| Contig_2194  | -         | - | -         | -     | -      | 99.84 | -         | -     | -         | -     | -      | -     | -         | -     | -         | -     | -      | - | -         | - | -         | -     | -      | 86.32 |
| Contig_22692 | -         | - | -         | -     | -      | -     | 99.86     | -     | -         | 99.88 | -      | -     | -         | -     | -         | -     | -      | - | -         | - | -         | -     | -      | 86.75 |
| Contig_21166 | -         | - | -         | -     | -      | -     | -         | 99.67 | 98.95     | -     | -      | -     | -         | -     | -         | -     | -      | - | -         | - | -         | -     | -      | -     |
| Contig_2613  | -         | - | -         | -     | -      | -     | -         | 98.02 | 99.04     | -     | -      | -     | -         | -     | -         | -     | -      | - | -         | - | -         | -     | -      | -     |
| Contig_21891 | -         | - | -         | -     | -      | -     | -         | 99.41 | 99.29     | -     | -      | -     | -         | -     | -         | -     | -      | - | -         | - | -         | -     | -      | -     |
| Contig_21357 | -         | - | -         | -     | -      | -     | -         | 99.80 | 99.69     | -     | -      | -     | -         | -     | -         | -     | -      | - | -         | - | -         | -     | -      | -     |
| Contig_20560 | -         | - | -         | -     | -      | -     | -         | 99.70 | 99.74     | -     | -      | -     | -         | -     | -         | -     | -      | - | -         | - | -         | -     | -      | -     |
| Contig_2618  | -         | - | -         | -     | -      | -     | -         | 99.84 | 99.77     | -     | -      | -     | -         | -     | -         | -     | -      | - | -         | - | -         | -     | -      | -     |
| Contig_3634  | -         | - | -         | -     | -      | -     | -         | 99.48 | 99.80     | -     | -      | -     | -         | -     | -         | -     | -      | - | -         | - | -         | -     | -      | -     |
| Contig_1567  | -         | - | -         | -     | -      | -     | -         | -     | -         | 86.67 | 86.58  | 86.54 | -         | -     | -         | -     | -      | - | -         | - | -         | -     | -      | -     |
| Contig_1550  | -         | - | -         | -     | -      | -     | -         | -     | -         | 87.81 | 87.99  | 87.64 | -         | -     | -         | -     | -      | - | -         | - | -         | -     | -      | -     |
| Contig_19925 | -         | - | -         | -     | -      | -     | -         | -     | -         | 99.82 | 99.79  | 99.78 | -         | -     | -         | -     | -      | - | -         | - | -         | -     | -      | -     |
| Contig_2285  | -         | - | -         | -     | -      | -     | -         | -     | -         | 99.93 | 100.00 | 99.88 | -         | -     | -         | -     | -      | - | -         | - | -         | -     | -      | -     |
| Contig_228   | -         | - | -         | -     | -      | -     | -         | -     | -         | 99.95 | -      | 99.94 | -         | -     | -         | -     | -      | - | -         | - | -         | -     | -      | -     |
| Contig_22223 | -         | - | -         | -     | -      | -     | -         | -     | -         | 99.92 | 99.74  | 99.95 | -         | -     | -         | -     | -      | - | -         | - | -         | -     | -      | -     |
| Contig_2090  | -         | - | -         | -     | -      | -     | -         | -     | -         | -     | -      | -     | 99.88     | 99.85 | -         | -     | -      | - | -         | - | -         | -     | -      | -     |
| Contig_2244  | -         | - | -         | -     | -      | -     | -         | -     | -         | -     | -      | -     | 99.82     | 99.83 | 99.82     | -     | -      | - | -         | - | -         | -     | -      | -     |
| Contig_291   | -         | - | -         | -     | -      | -     | -         | -     | -         | -     | -      | -     | 99.82     | 99.81 | 99.84     | -     | -      | - | -         | - | -         | -     | -      | -     |
| Contig_2061  | -         | - | -         | -     | -      | -     | -         | -     | -         | -     | -      | -     | 99.83     | 99.85 | 99.85     | -     | -      | - | -         | - | -         | -     | -      | -     |
| Contig_20697 | -         | - | -         | -     | -      | -     | -         | -     | -         | -     | -      | -     | 99.78     | 99.88 | 99.87     | -     | -      | - | -         | - | -         | -     | -      | -     |
| Contig_2058  | -         | - | -         | -     | -      | -     | -         | -     | -         | -     | -      | -     | 99.70     | 99.81 | 99.94     | -     | -      | - | -         | - | -         | -     | -      | -     |
| Contig_1567  | -         | - | -         | -     | -      | -     | -         | -     | -         | -     | -      | -     | 87.30     | -     | -         | 99.81 | -      | - | -         | - | -         | -     | 86.71  | -     |
| Contig_1550  | -         | - | -         | -     | -      | -     | -         | -     | -         | 86.58 | 86.54  | -     | -         | -     | -         | 99.83 | -      | - | -         | - | -         | -     | 87.89  | -     |
| Contig_1603  | -         | - | -         | -     | -      | -     | -         | -     | -         | -     | -      | -     | -         | -     | -         | -     | -      | - | -         | - | 99.76     | 99.73 | -      | -     |
| Contig_423   | -         | - | -         | -     | -      | -     | -         | -     | -         | -     | -      | -     | -         | -     | -         | -     | -      | - | -         | - | 99.71     | 99.73 | -      | -     |
| Contig_22976 | -         | - | -         | -     | -      | -     | -         | -     | -         | -     | -      | -     | -         | -     | -         | -     | -      | - | -         | - | 99.73     | 99.74 | -      | -     |
| Contig_405   | -         | - | -         | -     | -      | -     | -         | -     | -         | -     | -      | -     | -         | -     | -         | -     | -      | - | -         | - | 99.77     | 99.78 | -      | -     |
| Contig_406   | -         | - | -         | -     | -      | -     | -         | -     | -         | -     | -      | -     | -         | -     | -         | -     | -      | - | -         | - | 99.78     | 99.78 | -      | -     |
| Contig_22975 | -         | - | -         | -     | -      | -     | -         | -     | -         | -     | -      | -     | -         | -     | -         | -     | -      | - | -         | - | 99.77     | 99.81 | -      | -     |
| Contig_2788  | -         | - | -         | -     | -      | -     | -         | -     | -         | -     | -      | -     | -         | -     | -         | -     | -      | - | -         | - | -         | -     | 99.83  | 99.78 |
| Contig_22597 | -         | - | -         | -     | -      | -     | -         | -     | -         | -     | -      | -     | -         | -     | -         | -     | -      | - | -         | - | -         | -     | 99.81  | 99.80 |
| Contig_2786  | -         | - | -         | -     | -      | -     | -         | -     | -         | -     | -      | -     | -         | -     | -         | -     | -      | - | -         | - | -         | -     | 99.83  | 99.80 |

**Table S9. List of 121 reference human gut-associated microbial genomes**

| <b>Species and strain designation</b>        | <b>GenBank Accession number</b> | <b>CRISPR Loci</b> |
|----------------------------------------------|---------------------------------|--------------------|
| Actinomyces odontolyticus                    | NZ_AAYI00000000                 | Present            |
| Alistipes putredinis                         | NZ_ABFK00000000                 | Absent             |
| Anaerococcus hydrogenalis                    | NZ_ABXA00000000                 | Present            |
| Anaerofustis stercorihominis                 | NZ_ABIL00000000                 | Absent             |
| Anaerostipes caccae                          | NZ_ABAX00000000                 | Present            |
| Anaerotruncus colihominis                    | NZ_ABGD00000000                 | Absent             |
| Bacteroides caccae ATCC 43185                | NZ_AAVM00000000                 | Absent             |
| Bacteroides capillosus                       | NZ_AAXG00000000                 | Present            |
| Bacteroides cellulosilyticus                 | NZ_ACCH00000000                 |                    |
| Bacteroides coprocola                        | NZ_ABIY00000000                 | Present            |
| Bacteroides coprophilus                      | NZ_ACBW00000000                 |                    |
| Bacteroides dorei                            | NZ_ABWZ00000000                 | Present            |
| Bacteroides eggerthii                        | NZ_ABVO00000000                 | Absent             |
| Bacteroides finegoldii                       | NZ_ABXI00000000                 | Absent             |
| Bacteroides fragilis 3 1 12                  | NZ_ABZX00000000                 | Present            |
| Bacteroides fragilis NCTC 9343               | NC_006347                       |                    |
| Bacteroides fragilis YCH46                   | NC_003228                       |                    |
| Bacteroides intestinalis                     | NZ_ABJL00000000                 | Absent             |
| Bacteroides ovatus ATCC 8483                 | NZ_AAXF00000000                 | Absent             |
| Bacteroides plebeius                         | NZ_ABQC00000000                 | Present            |
| Bacteroides sp 1 1 6                         | NZ_ACIC00000000                 |                    |
| Bacteroides sp. D1                           | NZ_ACAB00000000                 |                    |
| Bacteroides sp. D2                           | NZ_ACGA00000000                 |                    |
| Bacteroides stercoris                        | NZ_ABFZ00000000                 | Absent             |
| Bacteroides thetaiotaomicron 7330            |                                 |                    |
| Bacteroides thetaiotaomicron VPI-5482        | NC_004663                       | Absent             |
| Bacteroides uniformis ATCC 8492              | NZ_AAYH00000000                 | Absent             |
| Bacteroides vulgatus ATCC 8482               | NC_009614                       | Absent             |
| Bacteroides WH2                              |                                 |                    |
| Bacteroides xylanisolvens XB1A               | ProjectID:39177                 | Absent             |
| Bifidobacterium adolescentis                 | NZ_AAXD00000000                 | Present            |
| Bifidobacterium adolescentis ATCC 15703      | NC_008618                       | Present            |
| Bifidobacterium angulatum                    | NZ_ABYS00000000                 | Present            |
| Bifidobacterium animalis HN019.fa            | NZ_ABOT00000000                 |                    |
| Bifidobacterium animalis subsp. lactis AD011 | NC_011740                       |                    |
| Bifidobacterium breve                        | NZ_ACCG00000000                 | Absent             |
| Bifidobacterium catenulatum                  | NZ_ABXY00000000                 | Present            |
| Bifidobacterium dentium                      | NZ_ABIX00000000                 | Present            |
| Bifidobacterium gallicum                     | NZ_ABXB00000000                 | Present            |
| Bifidobacterium longum DJO10A                | NC_010816                       | Present            |
| Bifidobacterium longum NCC2705               | NC_004307                       |                    |
| Bifidobacterium pseudocatenulatum            | NZ_ABXX00000000                 | Present            |
| Blautia hansenii                             | NZ_ABYU00000000                 | Present            |
| Blautia hydrogenotrophica DSM 10507          | NZ_ACBZ00000000                 | Absent             |
| Bryantella formatexigens DSM 14469           | NZ_ACCL00000000                 |                    |
| Butyrivibrio crossotus                       | NZ_ABWN00000000                 | Absent             |
| Catenibacterium mitsuokai                    | NZ_ACCK00000000                 |                    |
| Citrobacter sp                               | NZ_ACDJ00000000                 |                    |
| Clostridium asparagiforme                    | NZ_ACCJ00000000                 |                    |
| Clostridium bartlettii                       | NZ_ABEZ00000000                 | Present            |
| Clostridium bolteae                          | NZ_ABCC00000000                 | Present            |
| Clostridium hiranonis                        | NZ_ABWP00000000                 | Present            |
| Clostridium hylemonae                        | NZ_ABYI00000000                 |                    |
| Clostridium leptum                           | NZ_ABCB00000000                 | Absent             |
| Clostridium methylpentosum                   | NZ_ACEC00000000                 |                    |
| Clostridium nexile                           | NZ_ABWO00000000                 | Present            |
| Clostridium ramosum                          | NZ_ABFX00000000                 | Present            |
| Clostridium scindens ATCC 35704              | NZ_ABFY00000000                 | Present            |
| Clostridium sp L2                            | NZ_AAYW00000000                 | Present            |
| Clostridium sp M62 1                         | NZ_ACFX00000000                 |                    |

|                                                        |                 |         |
|--------------------------------------------------------|-----------------|---------|
| Clostridium sp SS2                                     | NZ_ABGC00000000 |         |
| Clostridium spiroforme DSM 1552                        | NZ_ABIK00000000 | Present |
| Clostridium sporogenes                                 | NZ_ABKW00000000 | Present |
| Clostridium symbiosum                                  | ProjectID:18183 | Present |
| Collinsella aerofaciens ATCC 25986                     | NZ_AAVN00000000 | Absent  |
| Collinsella intestinalis                               | NZ_ABXH00000000 | Absent  |
| Collinsella stercoris                                  | NZ_ABXJ00000000 | Absent  |
| Coprococcus comes                                      | NZ_ABVR00000000 |         |
| Coprococcus eutactus                                   | NZ_ABEY00000000 | Present |
| Desulfovibrio piger ATCC29098                          | NZ_ABXU00000000 | Present |
| Desulfovibrio piger GOR1                               | ProjectID:30377 |         |
| Dorea formicigenerans                                  | NZ_AAXA00000000 | Absent  |
| Dorea longicatena DSM 13814                            | NZ_AAXB00000000 | Present |
| Enterobacter cancerogenus                              | NZ_ABWM00000000 | Present |
| Escherichia coli str. K-12 substr. MG1655              | NC_000913       |         |
| Escherichia fergusonii ATCC 35469                      | NC_011835       |         |
| Eubacterium bifforme                                   | NZ_ABYT00000000 | Present |
| Eubacterium dolichum                                   | NZ_ABAW00000000 | Present |
| Eubacterium eligens ATCC 27750                         | NC_012778       | Present |
| Eubacterium hallii                                     | NZ_ACEP00000000 | Present |
| Eubacterium rectale ATCC 33656                         | NC_012781       | Present |
| Eubacterium ventriosum                                 | NZ_AAVL00000000 | Present |
| Faecalibacterium prausnitzii M21/2                     | NZ_ABED00000000 | Present |
| Fusobacterium sp. 4 1 13                               | NZ_ACDE00000000 |         |
| Fusobacterium varium ATCC27725                         | NZ_ACIE00000000 |         |
| Helicobacter pylori HPAG1                              | NC_008086       |         |
| Holdemania filiformis                                  | NZ_ACCF00000000 |         |
| Lactobacillus casei ATCC 334                           | NC_008526       |         |
| Lactobacillus delbrueckii subsp. bulgaricus ATCC 11842 | NC_008054       |         |
| Lactococcus lactis subsp. cremoris MG1363              | NC_009004       |         |
| Lactococcus lactis subsp. cremoris SK11                | NC_008527       |         |
| Lactococcus lactis subsp. lactis II1403                | NC_002662       |         |
| M23A                                                   |                 |         |
| Methanobrevibacter smithii ATCC 35061                  | NC_009515       | Present |
| Methanobrevibacter smithii DSM2374                     | NZ_ABYV00000000 |         |
| Methanobrevibacter smithii DSM2375                     | NZ_ABYW00000000 |         |
| Methanosphaera stadtmanae DSM 3091                     | NC_007681       |         |
| Mitsuokella multacida                                  | NZ_ABWK00000000 | Present |
| Parabacteroides distasonis ATCC 8503                   | NC_009615       | Present |
| Parabacteroides johnsonii                              | NZ_ABYH00000000 | Absent  |
| Parabacteroides merdae                                 | NZ_AAXE00000000 | Present |
| Peptostreptococcus micros                              | NZ_ABEE00000000 | Present |
| Prevotella copri                                       | NZ_ACBX00000000 | Absent  |
| Proteus penneri                                        | NZ_ABVP00000000 |         |
| Providencia alcalifaciens                              | NZ_ABXW00000000 | Absent  |
| Providencia rettgeri                                   | NZ_ACCI00000000 |         |
| Providencia rustigianii                                | NZ_ABXV00000000 | Present |
| Providencia stuartii                                   | NZ_ABJD00000000 | Present |
| Roseburia intestinalis L1                              | NZ_ABYJ00000000 |         |
| Ruminococcus bromiiL263                                | ProjectID:39153 | Absent  |
| Ruminococcus gnavus                                    | NZ_AAYG00000000 | Present |
| Ruminococcus lactaris                                  | NZ_ABOU00000000 | Present |
| Ruminococcus obeum ATCC 29174                          | NZ_AAVO00000000 | Absent  |
| Ruminococcus torques ATCC 27756                        | NZ_AAVP00000000 | Absent  |
| Shigella sp. D9                                        | NZ_ACDL00000000 |         |
| Streptococcus infantarius                              | NZ_ABJK00000000 | Present |
| Streptococcus thermophilus CNRZ1066                    | NC_006448       |         |
| Streptococcus thermophilus DN001147.fa                 | NC_006449       |         |
| Streptococcus thermophilus LMD-9                       | NC_008532       |         |
| Subdoligranulum variabile                              | NZ_ACBY00000000 |         |
| Victivallis vadensis ATCC BAA-548                      | NZ_ABDE00000000 |         |

**Table S10. List of 396 microbial genomes used to search for prophages**

| Species and strain designation                      | GenBank Accession No | Species and strain designation                              | GenBank Accession No |
|-----------------------------------------------------|----------------------|-------------------------------------------------------------|----------------------|
| Acinetobacter sp. ADP1                              | NZ_005966            | Legionella pneumophila subsp. pneumophila str. Philadelphia | NC_002942            |
| Actinomyces odontolyticus                           | NZ_AAY100000000      | Leifsonia xylis subsp. xylis str. CTCB07                    | NC_006087            |
| Agrobacterium tumefaciens str. C58                  | NC_003063            | Leptospira interrogans serovar Copenhageni str. Fiocruz L1- | NC_005823            |
| Agrobacterium tumefaciens str. C58                  | NC_003062            | Leptospira interrogans serovar Copenhageni str. Fiocruz L1- | NC_005824            |
| Alistipes putredinis                                | NZ_ABFK000000000     | Leptospira interrogans serovar Lai str. 56601               | NC_004342            |
| Anabaena variabilis ATCC 29413                      | NC_007413            | Leptospira interrogans serovar Lai str. 56601               | NC_004343            |
| Anaerococcus hydrogenalis                           | NZ_ABXA000000000     | Listeria innocua Clj11262                                   | NC_003212            |
| Anaerofustis stercorihominis                        | NZ_ABIL000000000     | Listeria monocytogenes EGD-e                                | NC_003210            |
| Anaerostipes caccae                                 | NZ_ABAX000000000     | Listeria monocytogenes str. 4b F2365                        | NC_002973            |
| Anaerotruncus colihominis                           | NZ_ABGD000000000     | M23A                                                        |                      |
| Anaplasma marginale str. St. Maries                 | NC_004842            | Magnetospirillum magneticum AMB-1                           | NC_007626            |
| Aquifex aeolicus VFS                                | NC_000918            | Mannheimia succiniciproducens MBEL55E                       | NC_006300            |
| Aster yellows witches'-broom phytoplasma AYWB       | NC_007716            | Mesoplasma florum L1                                        | NC_006055            |
| Azoarcus sp. EbN1                                   | NC_006513            | Mesorhizobium loti MAFF303099                               | NC_002678            |
| Bacillus anthracis str. 'Ames Ancestor'             | NC_007530            | Methanobrevibacter smithii ATCC 35061                       | NC_009515            |
| Bacillus anthracis str. Ames                        | NC_003997            | Methanobrevibacter smithii DSM2374                          | NZ_ABYV000000000     |
| Bacillus anthracis str. Sterne                      | NC_005945            | Methanobrevibacter smithii DSM2375                          | NZ_ABYW000000000     |
| Bacillus cereus ATCC 10987                          | NC_003909            | Methanospaera stadmanae DSM 3091                            | NC_007681            |
| Bacillus cereus ATCC 14579                          | NC_004722            | Methylococcus capsulatus str. Bath                          | NC_002977            |
| Bacillus cereus E33L                                | NC_006274            | Mitsuokella multacida                                       | NZ_ABWK000000000     |
| Bacillus clausii KSM-K16                            | NC_006582            | Moorella thermoacetica ATCC 39073                           | NC_007644            |
| Bacillus halodurans C-125                           | NC_002570            | Mycobacterium avium subsp. paratuberculosis str. k10        | NC_002944            |
| Bacillus licheniformis ATCC 14580                   | NC_006270            | Mycobacterium bovis AF2122/97                               | NC_002945            |
| Bacillus subtilis subsp. subtilis str. 168          | NC_000964            | Mycobacterium leprae TN                                     | NC_002677            |
| Bacillus thuringiensis serovar konkukian str. 97-27 | NC_005957            | Mycobacterium tuberculosis CDC1551                          | NC_002755            |
| Bacteroides caccae ATCC 43185                       | NZ_AAVM000000000     | Mycobacterium tuberculosis H37Rv                            | NC_009662            |
| Bacteroides capillosus                              | NZ_AAXG000000000     | Mycoplasma capricolum subsp. capricolum ATCC 27343          | NC_007633            |
| Bacteroides cellulolyticus                          | NZ_ACCH000000000     | Mycoplasma gallisepticum R                                  | NC_004829            |
| Bacteroides coprocola                               | NZ_ABYI000000000     | Mycoplasma genitalium G-37                                  | NC_000908            |
| Bacteroides coprophilus                             | NZ_ACBW000000000     | Mycoplasma hyopneumoniae 232                                | NC_006360            |
| Bacteroides dorei                                   | NZ_ABWZ000000000     | Mycoplasma hyopneumoniae 7448                               | NC_007332            |
| Bacteroides eggerthii                               | NZ_ABVO000000000     | Mycoplasma hyopneumoniae J                                  | NC_007295            |
| Bacteroides finegoldii                              | NZ_ABXI000000000     | Mycoplasma mobile 163K                                      | NC_006908            |
| Bacteroides fragilis NCTC 9343                      | NC_003228            | Mycoplasma mycoides subsp. mycoides SC str. PG1             | NC_005364            |
| Bacteroides fragilis YCH46                          | NC_006347            | Mycoplasma penetrans HF-2                                   | NC_004432            |
| Bacteroides intestinalis                            | NZ_ABJL000000000     | Mycoplasma pneumoniae M129                                  | NC_000912            |
| Bacteroides ovatus ATCC 8483                        | NZ_AAXF000000000     | Mycoplasma pulmonis UAB CTIP                                | NC_002771            |
| Bacteroides plebeius                                | NZ_ABQC000000000     | Mycoplasma synoviae 53                                      | NC_007294            |
| Bacteroides stercoris                               | NZ_ABFZ000000000     | Neisseria gonorrhoeae FA 1090                               | NC_002946            |
| Bacteroides thetaiotaomicron VPI-5482               | NC_004663            | Neisseria meningitidis MC58                                 | NC_003112            |
| Bacteroides uniformis ATCC 8492                     | NZ_AAYH000000000     | Neisseria meningitidis Z2491                                | NC_003116            |
| Bacteroides vulgatus ATCC 8482                      | NC_009614            | Nitrobacter winogradskyi Nb-255                             | NC_007406            |
| Bartonella henselae str. Houston-1                  | NC_005956            | Nitrosococcus oceani ATCC 19707                             | NC_007484            |
| Bartonella quintana str. Toulouse                   | NC_005955            | Nitrosomonas europaea ATCC 19718                            | NC_004757            |
| Bdellovibrio bacteriovorus HD100                    | NC_005363            | Nitrosospora multiformis ATCC 25196                         | NC_007614            |
| Bifidobacterium adolescentis                        | NZ_AAXD000000000     | Nocardia farcinica IFM 10152                                | NC_006361            |
| Bifidobacterium adolescentis ATCC 15703             | NC_008618            | Nostoc sp. PCC 7120                                         | NC_003272            |
| Bifidobacterium angulatum                           | NZ_ABSY000000000     | Novosphingobium aromaticivorans DSM 12444                   | NC_007794            |
| Bifidobacterium breve                               | NZ_ACCG000000000     | Oceanobacillus iheyensis HTE831                             | NC_004193            |
| Bifidobacterium catenulatum                         | NZ_ABXV000000000     | Onion yellows phytoplasma OY-M                              | NC_005303            |
| Bifidobacterium dentium                             | NZ_ABXI000000000     | Parabacteroides distans ATCC 8503                           | NC_009615            |
| Bifidobacterium gallium                             | NZ_ABXB000000000     | Parabacteroides johnsonii                                   | NZ_ABYH000000000     |
| Bifidobacterium longum DJO10A                       | NC_010816            | Parabacteroides merdae                                      | NZ_AAXE000000000     |
| Bifidobacterium longum NCC2705                      | NC_004307            | Parachlamydia sp. UWE25                                     | NC_005861            |
| Bifidobacterium pseudocatenulatum                   | NZ_ABXX000000000     | Pasteurella multocida subsp. multocida str. Pm70            | NC_002663            |
| Blautia hansenii                                    | NZ_ABYU000000000     | Pelobacter carbinolicus DSM 2380                            | NC_007498            |
| Blautia hydrogenotrophica DSM 10507                 | NZ_ACBZ000000000     | Peloidictyon luteolum DSM 273                               | NC_007512            |
| Bordetella pertussis Tohama I                       | NC_002929            | Peptostreptococcus micros                                   | NZ_ABEEO00000000     |
| Borrelia burgdorferi B31                            | NC_001318            | Photobacterium profundum SS9                                | NC_006370            |
| Borrelia garinii PBI                                | NC_006156            | Photobacterium profundum SS9                                | NC_006371            |
| Bradyrhizobium japonicum USDA 110                   | NC_004463            | Phorhydradus luminescens subsp. laumondii TTO1              | NC_005126            |
| Brucella abortus biovar 1 str. 9-941                | NC_006932            | Phytophthora ramorum str. 9803                              | NC_002950            |
| Brucella abortus biovar 1 str. 9-941                | NC_006933            | Prevotella copri                                            | NZ_ACBX000000000     |
| Brucella melitensis 16M                             | NC_003317            | Prochlorococcus marinus str. MIT 9312                       | NC_007577            |
| Brucella melitensis 16M                             | NC_003318            | Prochlorococcus marinus str. MIT 9313                       | NC_005071            |
| Brucella melitensis biovar Abortus                  | NC_007618            | Prochlorococcus marinus str. NATL2A                         | NC_007335            |
| Brucella suis 1330                                  | NC_004310            | Prochlorococcus marinus subsp. marinus str. CCMP1375        | NC_005042            |
| Brucella suis 1330                                  | NC_004311            | Prochlorococcus marinus subsp. pastoris str. CCMP1986       | NC_005072            |
| Bryantella formatexigens DSM 14469                  | NZ_AACL000000000     | Propionibacterium acnes KPA171202                           | NC_006085            |
| Buchnera aphidicola str. APS (Acyrthosiphon pisum)  | NC_002528            | Proteus penneri                                             | NZ_ABP000000000      |
| Buchnera aphidicola str. Bp (Baizongia pistaciae)   | NC_004545            | Providencia alcalifaciens                                   | NZ_ABXW000000000     |
| Buchnera aphidicola str. Sg (Schizaphis graminum)   | NC_004061            | Providencia rettgeri                                        | NZ_ACCI000000000     |
| Burkholderia mallei ATCC 23344                      | NC_006348            | Providencia rustigianii                                     | NZ_ABXV000000000     |
| Burkholderia mallei ATCC 23344                      | NC_006349            | Providencia stuartii                                        | NZ_ABDJ000000000     |
| Burkholderia pseudomallei 1710b                     | NC_007434            | Pseudoalteromonas haloplanktis TAC125                       | NC_007481            |
| Burkholderia pseudomallei 1710b                     | NC_007435            | Pseudoalteromonas haloplanktis TAC125                       | NC_007482            |
| Burkholderia pseudomallei K96243                    | NC_006350            | Pseudomonas aeruginosa PAO1                                 | NC_002516            |
| Burkholderia pseudomallei K96243                    | NC_006351            | Pseudomonas fluorescens Pf-5                                | NC_004129            |
| Burkholderia sp. 383                                | NC_007509            | Pseudomonas fluorescens PfO-1                               | NC_007492            |
| Burkholderia sp. 383                                | NC_007510            | Pseudomonas putida KT2440                                   | NC_002947            |
| Burkholderia sp. 383                                | NC_007511            | Pseudomonas syringae pv. phaseolicola 1448A                 | NC_005773            |
| Burkholderia thailandensis E264                     | NC_007650            | Pseudomonas syringae pv. syringae B728a                     | NC_007005            |
| Burkholderia thailandensis E264                     | NC_007651            | Pseudomonas syringae pv. tomato str. DC3000                 | NC_004578            |
| Butyrivibrio crossotus                              | NZ_ABWN000000000     | Psychrobacter arcticus 273-4                                | NC_007204            |
| Campylobacter jejuni RM1221                         | NC_003912            | Ralstonia eutropha JMP134                                   | NC_007347            |
| Campylobacter jejuni subsp. jejuni NCTC 11168       | NC_002163            | Ralstonia eutropha JMP134                                   | NC_007348            |
| Candidatus Blochmannia floridanus                   | NC_005061            | Ralstonia solanacearum GMI1000                              | NC_003295            |
| Candidatus Blochmannia pennsylvanicus str. BPEN     | NC_007292            | Rhodobacter sphaeroides 2.4.1                               | NC_007493            |
| Candidatus Pelagibacter ubique HTCC1062             | NC_007205            | Rhodobacter sphaeroides 2.4.1                               | NC_007494            |
| Carboxydotherrmus hydrogenoformans Z-2901           | NC_007503            | Rhodopirellula baltica SH 1                                 | NC_005027            |
| Catenibacterium mitsuokai                           | NZ_ACKK000000000     | Rhodopseudomonas palustris CGA009                           | NC_005296            |
| Caulobacter crescentus CB15                         | NC_002696            | Rhodopseudomonas palustris HaA2                             | NC_007778            |
| Chlamydia muridarum Nigg                            | NC_002620            | Rhodospirillum rubrum ATCC 11170                            | NC_007643            |
| Chlamydia trachomatis A/HAR-13                      | NC_007429            | Rickettsia conorii str. Malish 7                            | NC_003103            |



|                                                           |                  |                                                              |                  |
|-----------------------------------------------------------|------------------|--------------------------------------------------------------|------------------|
| Chlamydia trachomatis D/UW-3/CX                           | NC_000117        | Rickettsia felis URRWXCal2                                   | NC_007109        |
| Chlamydia abortus S26/3                                   | NC_004552        | Rickettsia prowazekii str. Madrid E                          | NC_000963        |
| Chlamydia caviae GPIC                                     | NC_003361        | Rickettsia typhi str. Wilmington                             | NC_006142        |
| Chlamydia pneumoniae AR39                                 | NC_002179        | Roseburia intestinalis L1                                    | NZ_ABYJ00000000  |
| Chlamydia pneumoniae CWL029                               | NC_000922        | Ruminococcus gnavus                                          | NZ_AAYG00000000  |
| Chlamydia pneumoniae J138                                 | NC_002491        | Ruminococcus lactaris                                        | NZ_ABOU00000000  |
| Chlamydia pneumoniae TW-183                               | NC_005043        | Ruminococcus obeum ATCC 29174                                | NZ_AAVO00000000  |
| Chlorobium chlorochromatii CaD3                           | NC_007514        | Ruminococcus torques ATCC 27756                              | NZ_AAVP00000000  |
| Chlorobium tepidum TLS                                    | NC_002932        | Salinibacter ruber DSM 13855                                 | NC_007677        |
| Chromobacterium violaceum ATCC 12472                      | NC_005085        | Salmonella enterica subsp. enterica serovar Choleraesuis str | NC_006905        |
| Citrobacter sp                                            | NZ_ACDJ000000000 | Salmonella enterica subsp. enterica serovar Paratyphi A str  | NC_006511        |
| Clostridium acetobutylicum ATCC 824                       | NC_003030        | Salmonella enterica subsp. enterica serovar Typhi str. CT18  | NC_003198        |
| Clostridium asparagiforme                                 | NZ_ACCJ000000000 | Salmonella enterica subsp. enterica serovar Typhi Ty2        | NC_004631        |
| Clostridium bartlettii                                    | NZ_ABEZ000000000 | Salmonella typhimurium LT2                                   | NC_003197        |
| Clostridium bolteae                                       | NZ_ABCC000000000 | Shewanella oneidensis MR-1                                   | NC_004347        |
| Clostridium hiranonis                                     | NZ_ABWP000000000 | Shigella boydii Sb227                                        | NC_007613        |
| Clostridium hylemonae                                     | NZ_ABYI000000000 | Shigella dysenteriae Sd197                                   | NC_007606        |
| Clostridium leptum                                        | NZ_ABCB000000000 | Shigella flexneri 2a str. 2457T                              | NC_004741        |
| Clostridium methylpentosum                                | NZ_ACEC000000000 | Shigella flexneri 2a str. 301                                | NC_004337        |
| Clostridium nexile                                        | NZ_ABWQ000000000 | Shigella sonnei Ss046                                        | NC_007384        |
| Clostridium perfringens str. 13                           | NC_003366        | Silicibacter pomeroyi DSS-3                                  | NC_003911        |
| Clostridium ramosum                                       | NZ_ABFX000000000 | Sinorhizobium meliloti 1021                                  | NC_003047        |
| Clostridium scindens ATCC 35704                           | NZ_ABFY000000000 | Sodalis glossinidius str. 'morsitans'                        | NC_007712        |
| Clostridium sp L2                                         | NZ_AAYW000000000 | Staphylococcus aureus RF122                                  | NC_007622        |
| Clostridium sp M62 1                                      | NZ_ACFX000000000 | Staphylococcus aureus subsp. aureus COL                      | NC_002951        |
| Clostridium sp SS2                                        | NZ_ABGC000000000 | Staphylococcus aureus subsp. aureus MRSA252                  | NC_002952        |
| Clostridium spiroforme DSM 1552                           | NZ_ABIK000000000 | Staphylococcus aureus subsp. aureus MSSA476                  | NC_002953        |
| Clostridium sporogenes                                    | NZ_ABKW000000000 | Staphylococcus aureus subsp. aureus Mu50                     | NC_002758        |
| Clostridium symbiosum                                     | ProjectID:18183  | Staphylococcus aureus subsp. aureus MW2                      | NC_003923        |
| Clostridium tetani E88                                    | NC_004557        | Staphylococcus aureus subsp. aureus N315                     | NC_002745        |
| Collinsella aerofaciens ATCC 25986                        | NZ_AAVN000000000 | Staphylococcus aureus subsp. aureus NCTC 8325                | NC_007795        |
| Collinsella intestinalis                                  | NZ_ABXH000000000 | Staphylococcus aureus subsp. aureus USA300                   | NC_007793        |
| Collinsella stercoris                                     | NZ_ABXJ000000000 | Staphylococcus epidermidis ATCC 12228                        | NC_004461        |
| Colwellia psychrerythraea 34H                             | NC_003910        | Staphylococcus epidermidis RP62A                             | NC_002976        |
| Coprococcus comes                                         | NZ_ABVR000000000 | Staphylococcus haemolyticus JCSC1435                         | NC_007168        |
| Coprococcus eutactus                                      | NZ_ABEY000000000 | Staphylococcus saprophyticus subsp. saprophyticus ATCC 1530  | NC_007350        |
| Corynebacterium diphtheriae NCTC 13129                    | NC_002935        | Streptococcus agalactiae 2603V/R                             | NC_004116        |
| Corynebacterium efficiens YS-314                          | NC_004369        | Streptococcus agalactiae A909                                | NC_007432        |
| Corynebacterium glutamicum ATCC 13032                     | NC_006958        | Streptococcus agalactiae NEM316                              | NC_004368        |
| Corynebacterium jeikeium K411                             | NC_007164        | Streptococcus infantarius                                    | NZ_ABJK000000000 |
| Coxiella burnetii RSA 493                                 | NC_002971        | Streptococcus mutans UA159                                   | NC_004350        |
| Cyanobacteria bacterium Yellowstone A-Prime               | NC_007775        | Streptococcus pneumoniae R6                                  | NC_003098        |
| Cyanobacteria bacterium Yellowstone B-Prime               | NC_007776        | Streptococcus pneumoniae TIGR4                               | NC_003028        |
| Dechloromonas aromatica RCB                               | NC_007298        | Streptococcus pyogenes M1 GAS                                | NC_002737        |
| Dehalococcoides ethenogenes 195                           | NC_002936        | Streptococcus pyogenes MGAS10394                             | NC_006086        |
| Dehalococcoides sp. CBD81                                 | NC_007356        | Streptococcus pyogenes MGAS315                               | NC_004070        |
| Deinococcus radiodurans R1                                | NC_001263        | Streptococcus pyogenes MGAS5005                              | NC_007297        |
| Deinococcus radiodurans R1                                | NC_001264        | Streptococcus pyogenes MGAS6180                              | NC_007296        |
| Desulfotalea psychrophila LSV54                           | NC_006138        | Streptococcus pyogenes MGAS8232                              | NC_003485        |
| Desulfovibrio desulfuricans G20                           | NC_007519        | Streptococcus pyogenes SSI-1                                 | NC_004606        |
| Desulfovibrio piger ATCC29098                             | NZ_ABXU000000000 | Streptococcus thermophilus CNRZ1066                          | NC_006449        |
| Desulfovibrio vulgaris subsp. vulgaris str. Hildenborough | NC_002937        | Streptococcus thermophilus LMG 18311                         | NC_006448        |
| Dorea formicigenerans                                     | NZ_AAXA000000000 | Streptomyces avermitilis MA-4680                             | NC_003155        |
| Dorea longicatena DSM 13814                               | NZ_AAXB000000000 | Streptomyces coelicolor A3(2)                                | NC_003888        |
| Ehrlichia canis str. Jake                                 | NC_007354        | Subdoligranulum variabile                                    | NZ_ACBY000000000 |
| Ehrlichia ruminantium str. Gardel                         | NC_006831        | Symbiobacterium thermophilum IAM 14863                       | NC_006177        |
| Ehrlichia ruminantium str. Welgevonden                    | NC_005295        | Synechococcus elongatus PCC 6301                             | NC_006576        |
| Ehrlichia ruminantium str. Welgevonden                    | NC_006832        | Synechococcus elongatus PCC 7942                             | NC_007604        |
| Enterobacter cancerogenus                                 | NZ_ABWM000000000 | Synechococcus sp. CC9605                                     | NC_007516        |
| Enterococcus faecalis V583                                | NC_004668        | Synechococcus sp. CC9902                                     | NC_007513        |
| Erwinia carotovora subsp. atroseptica SCRI1043            | NC_004547        | Synechococcus sp. WH 8102                                    | NC_005070        |
| Erythrobacter litoralis HTCC2594                          | NC_007722        | Synechocystis sp. PCC 6803                                   | NC_000911        |
| Escherichia coli CFT073                                   | NC_004431        | Syntrophus aciditrophicus SB                                 | NC_007759        |
| Escherichia coli K12                                      | NC_000913        | Thermoanaerobacter tengcongensis MB4                         | NC_003869        |
| Escherichia coli O157:H7                                  | NC_002695        | Thermobifida fusca YX                                        | NC_007333        |
| Escherichia coli O157:H7 EDL933                           | NC_002655        | Thermosynechococcus elongatus BP-1                           | NC_004113        |
| Eubacterium bifforme                                      | NZ_ABYT000000000 | Thermotoga maritima MSB8                                     | NC_000853        |
| Eubacterium dolichum                                      | NZ_ABAW000000000 | Thermus thermophilus HB27                                    | NC_005835        |
| Eubacterium hallii                                        | NZ_ACEP000000000 | Thermus thermophilus HB8                                     | NC_006461        |
| Eubacterium ventriosum                                    | NZ_AAVL000000000 | Thiobacillus denitrificans ATCC 25259                        | NC_007404        |
| Faecalibacterium prausnitzii M21/2                        | NZ_ABED000000000 | Thiomicrospira crunigena XCL-2                               | NC_007520        |
| Francisella tularensis subsp. tularensis SCHU 54          | NC_006570        | Thiomicrospira denitrificans ATCC 33889                      | NC_007575        |
| Frankia sp. Cc13                                          | NC_007777        | Treponema denticola ATCC 35405                               | NC_002967        |
| Fusobacterium nucleatum subsp. nucleatum ATCC 25586       | NC_003454        | Treponema pallidum subsp. pallidum str. Nichols              | NC_000919        |
| Geobacillus kaustophilus HTA426                           | NC_006510        | Tropheryma whipplei str. Twist                               | NC_004572        |
| Geobacter metallireducens GS-15                           | NC_007517        | Tropheryma whipplei TW08/27                                  | NC_004551        |
| Geobacter sulfurreducens PCA                              | NC_002939        | Ureaplasma parvum serovar 3 str. ATCC 700970                 | NC_002162        |
| Gloeobacter violaceus PCC 7421                            | NC_005125        | Vibrio cholerae O1 biovar eltor str. N16961                  | NC_002505        |
| Gluconobacter oxydans 621H                                | NC_006677        | Vibrio cholerae O1 biovar eltor str. N16961                  | NC_002506        |
| Haemophilus ducreyi 35000HP                               | NC_002940        | Vibrio fischeri ES114                                        | NC_006840        |
| Haemophilus influenzae 86-028NP                           | NC_007146        | Vibrio fischeri ES114                                        | NC_006841        |
| Haemophilus influenzae Rd KW20                            | NC_000907        | Vibrio parahaemolyticus RIMD 2210633                         | NC_004603        |
| Hahella chejuensis KCTC 2396                              | NC_007645        | Vibrio parahaemolyticus RIMD 2210633                         | NC_004605        |
| Helicobacter hepaticus ATCC 51449                         | NC_004917        | Vibrio vulnificus CMCP6                                      | NC_004459        |
| Helicobacter pylori 1039kx1                               | ProjectID:40515  | Vibrio vulnificus CMCP6                                      | NC_004460        |
| Helicobacter pylori 1039kx2                               | ProjectID:40519  | Vibrio vulnificus YJ016                                      | NC_005139        |
| Helicobacter pylori 26695                                 | NC_000915        | Vibrio vulnificus YJ016                                      | NC_005140        |
| Helicobacter pylori 345kx1                                | ProjectID:40545  | Wigglesworthia glossinidia endosymbiont of Glossina brevipa  | NC_004344        |
| Helicobacter pylori 345kx2                                | ProjectID:40547  | Wolbachia endosymbiont of Drosophila melanogaster            | NC_002978        |
| Helicobacter pylori 98_10                                 | NZ_ABSX000000000 | Wolbachia endosymbiont strain TRS of Brugia malayi           | NC_006833        |
| Helicobacter pylori B128                                  | NZ_ABSY000000000 | Xanthomonas axonopodis pv. citri str. 306                    | NC_005090        |
| Helicobacter pylori G27                                   | NC_011333        | Xanthomonas campestris pv. campestris str. 8004              | NC_003919        |
| Helicobacter pylori HPAG1                                 | NC_008086        | Xanthomonas campestris pv. campestris str. ATCC 33913        | NC_007086        |
| Helicobacter pylori J99                                   | NC_000921        | Xanthomonas campestris pv. vesicatoria str. 85-10            | NC_003902        |
| Helicobacter pylori P12                                   | NC_011498        | Xanthomonas oryzae pv. oryzae KACC10331                      | NC_007508        |
| Holdemanella filiformis                                   | NZ_ACCF000000000 | Xanthomonas oryzae pv. oryzae MAFF 311018                    | NC_006834        |
| Idiomarina loihiensis L2TR                                | NC_006512        |                                                              | NC_007705        |

Lactobacillus acidophilus NCFM  
Lactobacillus johnsonii NCC 533  
Lactobacillus plantarum WCFS1  
Lactobacillus sakei subsp. sakei 23K  
Lactococcus lactis subsp. lactis II1403  
Legionella pneumophila str. Lens  
Legionella pneumophila str. Paris

NC\_006814  
NC\_005362  
NC\_004567  
NC\_007576  
NC\_002662  
NC\_006369  
NC\_006368

Xylella fastidiosa 9a5c  
Xylella fastidiosa Temecula1  
Yersinia pestis biovar Medievalis str. 91001  
Yersinia pestis CO92  
Yersinia pestis KIM  
Yersinia pseudotuberculosis IP 32953  
Zymomonas mobilis subsp. mobilis ZM4

NC\_002488  
NC\_004556  
NC\_005810  
NC\_003143  
NC\_004088  
NC\_006155  
NC\_006526

**Table S11. Number of VLP reads with similarity over more than 90% of their length to CRISPR spacers present in either the fecal microbiome of the same individual or a reference human gut-associated microbial genome**

|          |           | Family 1  |           |        | Family 2  |           |        | Family 3  |           |        | Family 4  |           |        | Family 5  | Ref Gut Genomes |
|----------|-----------|-----------|-----------|--------|-----------|-----------|--------|-----------|-----------|--------|-----------|-----------|--------|-----------|-----------------|
|          |           | Co-twin 1 | Co-twin 2 | Mother | Co-twin 2 |                 |
| Family 1 | Co-twin 1 | 1         | -         | -      | -         | -         | -      | -         | -         | -      | -         | -         | -      | -         | 8.16            |
|          |           | 3         | -         | -      | -         | -         | -      | -         | -         | -      | -         | -         | -      | 0.23      | 0.69            |
|          | Co-twin 2 | 1         | -         | -      | -         | -         | -      | -         | -         | -      | -         | -         | -      | 3.65      | 66.35           |
|          |           | 1(R)      | -         | -      | -         | -         | -      | -         | -         | -      | -         | -         | -      | 7.38      | 80.05           |
|          |           | 2         | -         | -      | -         | -         | -      | -         | -         | -      | -         | -         | -      | -         | 65.07           |
|          | Mother    | 3         | -         | -      | -         | -         | -      | -         | -         | -      | -         | -         | -      | -         | 1.78            |
| 1        |           | -         | -         | -      | -         | -         | -      | -         | -         | -      | -         | -         | -      | 0.41      |                 |
|          | 2         | -         | -         | -      | -         | -         | -      | -         | -         | -      | -         | -         | -      | -         |                 |
| Family 2 | Co-twin 1 | 1         | -         | -      | -         | -         | -      | -         | -         | -      | -         | -         | -      | -         | -               |
|          |           | 1(R)      | -         | -      | -         | -         | -      | 0.42      | -         | -      | -         | -         | -      | -         | 3.78            |
|          | Co-twin 2 | 2         | -         | -      | -         | -         | -      | -         | -         | -      | -         | -         | -      | -         | 4.45            |
|          |           | 3         | -         | -      | -         | -         | -      | -         | -         | -      | -         | -         | -      | -         | -               |
|          |           | 1         | -         | -      | -         | -         | -      | -         | -         | -      | -         | -         | -      | 8.39      | 0.24            |
|          | Co-twin 2 | 1(R)      | -         | -      | -         | -         | -      | -         | -         | -      | -         | -         | -      | 5.62      | -               |
| 2        |           | -         | -         | -      | -         | -         | -      | -         | -         | -      | -         | -         | 3.03   | 1.93      |                 |
| Mother   | 1         | -         | -         | -      | -         | -         | -      | -         | -         | -      | -         | -         | -      | 0.29      |                 |
|          | 1(R)      | -         | -         | -      | -         | -         | -      | -         | -         | -      | -         | -         | 1.03   | 0.34      |                 |
|          | 2         | -         | -         | -      | -         | -         | -      | -         | -         | -      | -         | -         | -      | 0.36      |                 |
|          | 3         | -         | -         | -      | -         | -         | -      | -         | -         | -      | -         | -         | -      | -         |                 |
| Family 3 | Co-twin 1 | 1         | -         | -      | -         | -         | -      | -         | -         | -      | -         | -         | -      | 0.54      | -               |
|          |           | 2         | -         | -      | -         | -         | -      | -         | -         | -      | -         | -         | -      | -         | -               |
|          |           | 3         | -         | -      | -         | -         | -      | -         | -         | -      | -         | -         | -      | -         | -               |
|          | Co-twin 2 | 1         | -         | -      | -         | 0.94      | -      | -         | -         | -      | -         | -         | -      | -         | 2.81            |
|          |           | 2         | -         | -      | -         | -         | -      | -         | -         | -      | -         | -         | -      | -         | 0.59            |
|          |           | 3         | -         | -      | -         | -         | -      | -         | -         | -      | -         | -         | -      | -         | -               |
| Mother   | 1         | -         | -         | -      | -         | -         | -      | -         | -         | -      | -         | -         | -      | 7.17      |                 |
|          | 2         | -         | -         | -      | -         | -         | -      | 0.53      | -         | -      | -         | -         | 0.80   | 4.51      |                 |
| Family 4 | Co-twin 1 | 1         | -         | -      | -         | -         | -      | -         | -         | -      | -         | -         | -      | 2.04      | 6.11            |
|          |           | 2         | -         | -      | -         | -         | -      | -         | -         | -      | -         | -         | -      | 0.48      | 9.19            |
|          |           | 3         | -         | -      | -         | -         | -      | -         | -         | -      | -         | -         | -      | -         | -               |
|          | Co-twin 2 | 1         | -         | -      | -         | -         | -      | -         | -         | -      | -         | -         | -      | 8.23      | 46.18           |
|          |           | 3         | -         | -      | -         | -         | -      | -         | -         | -      | -         | -         | -      | -         | -               |
|          |           | 1         | -         | -      | -         | -         | -      | -         | -         | -      | -         | -         | -      | -         | 0.40            |
| Mother   | 2         | -         | -         | -      | -         | -         | -      | -         | -         | -      | -         | -         | -      | -         |                 |
|          | 3         | -         | -         | -      | -         | -         | -      | -         | -         | -      | -         | -         | -      | -         |                 |
|          | 3(R)      | -         | -         | -      | -         | -         | -      | -         | -         | -      | -         | -         | -      | -         |                 |
| Family 5 | Co-twin 2 | 1         | -         | -      | -         | -         | -      | -         | -         | -      | -         | -         | 2.68   | 0.21      |                 |
|          | 1(R)      | -         | -         | -      | -         | -         | -      | -         | -         | -      | -         | -         | 3.56   | 1.23      |                 |

**No. of spacers per fecal microbiome**

**9      24      52      13      36      17      26      14      22      21      57      49      241      2196**
